1 **A bidirectional network for appetite control in zebrafish**

2 **\*Caroline Lei Wee**<sup>1,2, 5</sup>, **\*Erin Yue Song**<sup>1</sup>, Robert Evan Johnson<sup>1,2</sup>, Deepak Ailani<sup>3</sup>, Owen  
3 Randlett<sup>1</sup>, Jiyeon Kim<sup>1</sup>, Maxim Nikitchenko<sup>1</sup>, Armin Bahl<sup>1</sup>, Chao-Tsung Yang<sup>4</sup>, Misha Ahrens<sup>4</sup>,  
4 Koichi Kawakami<sup>3</sup>, Florian Engert<sup>1</sup> and **Samuel Kunes**<sup>1</sup>

5 **\*Equal contribution first authors**

6 <sup>1</sup>Department of Molecular and Cell Biology, Harvard University, Cambridge, MA, USA

7 <sup>2</sup>Program in Neuroscience, Harvard University, Boston, MA, USA

8 <sup>3</sup>Division of Molecular and Developmental Biology, National Institute of Genetics, Department of  
9 Genetics, SOKENDAI (The Graduate University for Advanced Studies), Mishima, Shizuoka,  
10 Japan

11 <sup>4</sup>Howard Hughes Medical Institute, Janelia Farm Research Campus, Ashburn, Virginia, USA.

12 <sup>5</sup>Institute of Molecular and Cell Biology, A\*STAR, Singapore

13

14 **ABSTRACT**

15 Medial and lateral hypothalamic loci are known to suppress and enhance appetite, respectively,  
16 but their interactions and dynamics have not yet been explored. Here we report that, in  
17 zebrafish, serotonergic neurons of the ventromedial caudal hypothalamus (cH) become  
18 increasingly active during food deprivation, whereas activity in the lateral hypothalamus (LH) is  
19 reduced. Exposure to food sensory and consummatory cues reverses the activity states of  
20 these two nuclei, reflecting an opposing internal hunger state induced by food. An intermediate  
21 activity state is restored as satiety approaches. The overall antagonistic relationship of cH and  
22 LH was confirmed by simultaneous calcium imaging, and a causal relationship was established  
23 by targeted stimulation and ablation of the cH. The collective data allows us to propose a model  
24 in which activities in anti-correlated hypothalamic nuclei direct distinct phases of hunger, and  
25 thus coordinate energy balance via mutually antagonistic control of distinct behavioral outputs.

26

## 27 INTRODUCTION

28 The regulated intake of food based on caloric needs is a fundamental homeostatically controlled  
29 process that is essential for health and survival. The hypothalamus is a highly conserved central  
30 convergence point for the regulation of the neural and biochemical pathways underlying these  
31 basic mechanisms. Early studies demonstrated by way of electrical stimulation or lesions that  
32 specific hypothalamic regions play important roles in the regulation of appetite. For example,  
33 while stimulation of ventromedial hypothalamic loci in rodents and cats reduced feeding,  
34 activation of more lateral hypothalamic loci increased both hunting behavior and food intake  
35 (ANAND and BROBECK, 1951; BROBECK et al., 1956; DELGADO and ANAND, 1953; Krasne,  
36 1962). Conversely, lateral hypothalamic lesions were found to reduce feeding to the point of  
37 starvation, whereas medial hypothalamic lesions resulted in overeating (ANAND and BROBECK,  
38 1951; Hoebel, 1965; TEITELBAUM and EPSTEIN, 1962). Thus, the lateral and medial  
39 hypothalamic regions came to be regarded as “hunger” and “satiety” centers, respectively.

40 Recent experiments employing optical and electrophysiological methods have lent  
41 support to expectations based on these early studies. For example, GABAergic neurons in the  
42 lateral hypothalamus were observed to be activated during feeding and essential for enhanced  
43 food intake during hunger (Jennings et al., 2015; Stuber and Wise, 2016). However, these  
44 experiments have examined only subsets of hypothalamic neurons; their activity patterns in the  
45 context of the entire network remain unknown. This limited view hampers our understanding of  
46 the dynamical interactions between the ensemble of brain circuits thought to be important for  
47 the initiation, maintenance and termination of food consumption (Sternson and Eiselt, 2017).

48 Here, we leverage the small and optically accessible larval zebrafish to identify  
49 modulatory regions central to the control of appetite and to shed light on their specific roles and  
50 dynamical activity patterns in relation to the whole brain and behavior. Using pERK-based brain-  
51 wide activity mapping we first identified neuronal populations that display differential neural  
52 activity under conditions of hunger and satiety. We show that lateral and medial hypothalamic

53 regions have anti-correlated activity patterns during hunger, voracious feeding and satiety. Next,  
54 through a combination of calcium imaging, optogenetics and ablation analysis, we show that  
55 serotonergic neurons in the caudal periventricular zone of the medial hypothalamus (cH) are  
56 state-dependent regulators of feeding behavior, likely via their modulation of the lateral  
57 hypothalamus. This allows us to propose a model where mutually antagonistic brain states  
58 regulate energy balance by encoding distinct signals in different facets of appetite control.

59

## 60 **RESULTS**

### 61 ***Whole brain activity mapping of appetite-regulating regions***

62 Larval zebrafish hunt their prey, paramecia, through a sequence of motor actions that has been  
63 considered a hardwired reflex response to external prey stimuli (Bianco et al., 2011;  
64 Semmelhack et al., 2015; Trivedi and Bollmann, 2013). Only recently has evidence emerged  
65 that this behavior is flexibly modulated by satiation state (Filosa et al., 2016; Jordi et al., 2015,  
66 2018) and that larvae at 7 days post-fertilization (dpf) display enhanced hunting and enhanced  
67 food intake after a period of food deprivation. A robust readout of food intake in larval zebrafish  
68 was obtained both by fluorescently-labeled paramecia and behavioral analysis approaches that  
69 have been adapted for this study (Johnson et al., 2019; Jordi et al., 2015, 2018; Shimada et al.,  
70 2012). Given that a 2-hour period of food-deprivation is sufficient to robustly enhance  
71 subsequent food intake, fish at the end of this food-deprivation period are considered to be in a  
72 state of “hunger” and nutrient/caloric deficit. Indeed, up to 15 min after food-presentation, such  
73 food-deprived animals display a strong upregulation of hunting and food intake relative to fish  
74 with continuous access to food (fed fish). As the fish in this state are likely still in a  
75 caloric/nutrient deficit and display enhanced food intake, we will refer to this phase as  
76 “voracious feeding”. Finally, as the fish continue to consume food, their rate of food intake  
77 declines to a low level comparable to that of fed fish. As we describe below, this state of  
78 continuous low level feeding in the presence of ample food sources reflects a state of “satiety”

79 that is the same or similar to that of a continuously fed animal.

80 As a first step toward understanding the homeostatic control of feeding in this simple  
81 vertebrate system, we employed whole-brain neuronal activity mapping via phosphorylated ERK  
82 visualization in post-fixed animals (MAP-mapping; Randlett et al., 2015). Whole brain confocal  
83 image datasets of phospho-ERK expression were gathered from animals sacrificed after 15  
84 minutes of voracious feeding that followed a 2-hour period of food deprivation. For comparison,  
85 image sets were also gathered from animals that had been fed constantly. These image  
86 volumes were registered to a standardized brain atlas and are displayed as a difference map  
87 (Figure 1b), revealing significant differences in neural activity when comparing voracious  
88 feeding with constant feeding (Figure 1b-d, Video 1, Supplementary Tables 1-2). Since both  
89 experimental groups experienced similar sensory stimuli (i.e. exposure to the same  
90 concentration of paramecia), differences in brain activity should reflect the animal's internal  
91 hunger state, which could also manifest as an enhanced sensitivity to food cues, and/or  
92 enhanced hunting and prey capture. Indeed, multiple sensorimotor loci related to hunting  
93 showed enhanced activity in the food-deprived state. These included stronger activation in  
94 retinal Arborization Fields (AFs; optic tectum and AF7), pretectum, as well as downstream  
95 hindbrain loci, such as reticulospinal and oculomotor neurons that all have been shown to be  
96 engaged during prey capture behavior (Bianco and Engert, 2015; Muto et al., 2017;  
97 Semmelhack et al., 2015). In addition, enhanced activity was observed in the cerebellum,  
98 inferior olive, vagal sensory and motor neurons, area postrema and locus coeruleus, all of which  
99 have been implicated in producing motor programs related to feeding behavior (Ahima and  
100 Antwi, 2008; Ammar et al., 2001; Dockray, 2009; Zhu and Wang, 2008).

101 We next focused our attention on brain areas likely to be involved in regulating internal  
102 states related to hunger and satiety. These included an area of particularly strong differential  
103 activity in the lateral region of the intermediate hypothalamus (LH; Fig. 1b-d), which has recently  
104 been identified as part of the feeding pathway in larval zebrafish (Muto et al., 2017), and whose

105 mammalian analog has been strongly implicated in appetite control (Sternson and Eiselt, 2017).  
106 However, the zebrafish LH, unlike its mammalian counterpart, does not express melanin-  
107 concentrating hormone (MCH) or contain orexin (hypocretin)-positive neurons, nor does it  
108 clearly express other major feeding-related peptides (Figure 1- Figure Supplement 1 and 2).  
109 MCH, hypocretin and other appetite-related neuromodulators (AgRP, MSH, CART, NPY) are in  
110 fact expressed in other nearby areas of the hypothalamus (Figure 1 - Figure Supplement 1).  
111 The zebrafish LH region does however contain a variety of glutamatergic and GABAergic cell  
112 types (Figure 1 - Figure Supplement 2) that have been shown to be important for regulation of  
113 feeding in mammals, independent of MCH and orexin (Jennings et al., 2015; Stuber and Wise,  
114 2016). Among areas that showed relatively decreased neural activity upon feeding food-  
115 deprived animals, the most significant was the caudal hypothalamus (cH), which contains  
116 monoaminergic (mainly serotonergic and dopaminergic) neurons (Fig 1c; Kaslin and Panula,  
117 2001; Lillesaar, 2011). Indeed, in all of nine independent MAP-mapping experiments, activity  
118 was reduced in the cH and increased in the LH within 15 min of food presentation (Fig 1c). The  
119 evident inverse relationship between overall LH and cH activity in this context was supported by  
120 independent component analysis (Randlett et al., 2015), which was applied to all feeding-related  
121 MAP-mapping data, and uncovered multiple components where the cH and LH are strongly  
122 anti-correlated (Figure 1e, Figure 1 - Figure Supplement 3). These results led us to hypothesize  
123 that the lateral and caudal hypothalamus may form a functionally interconnected network with  
124 opposing activity patterns.

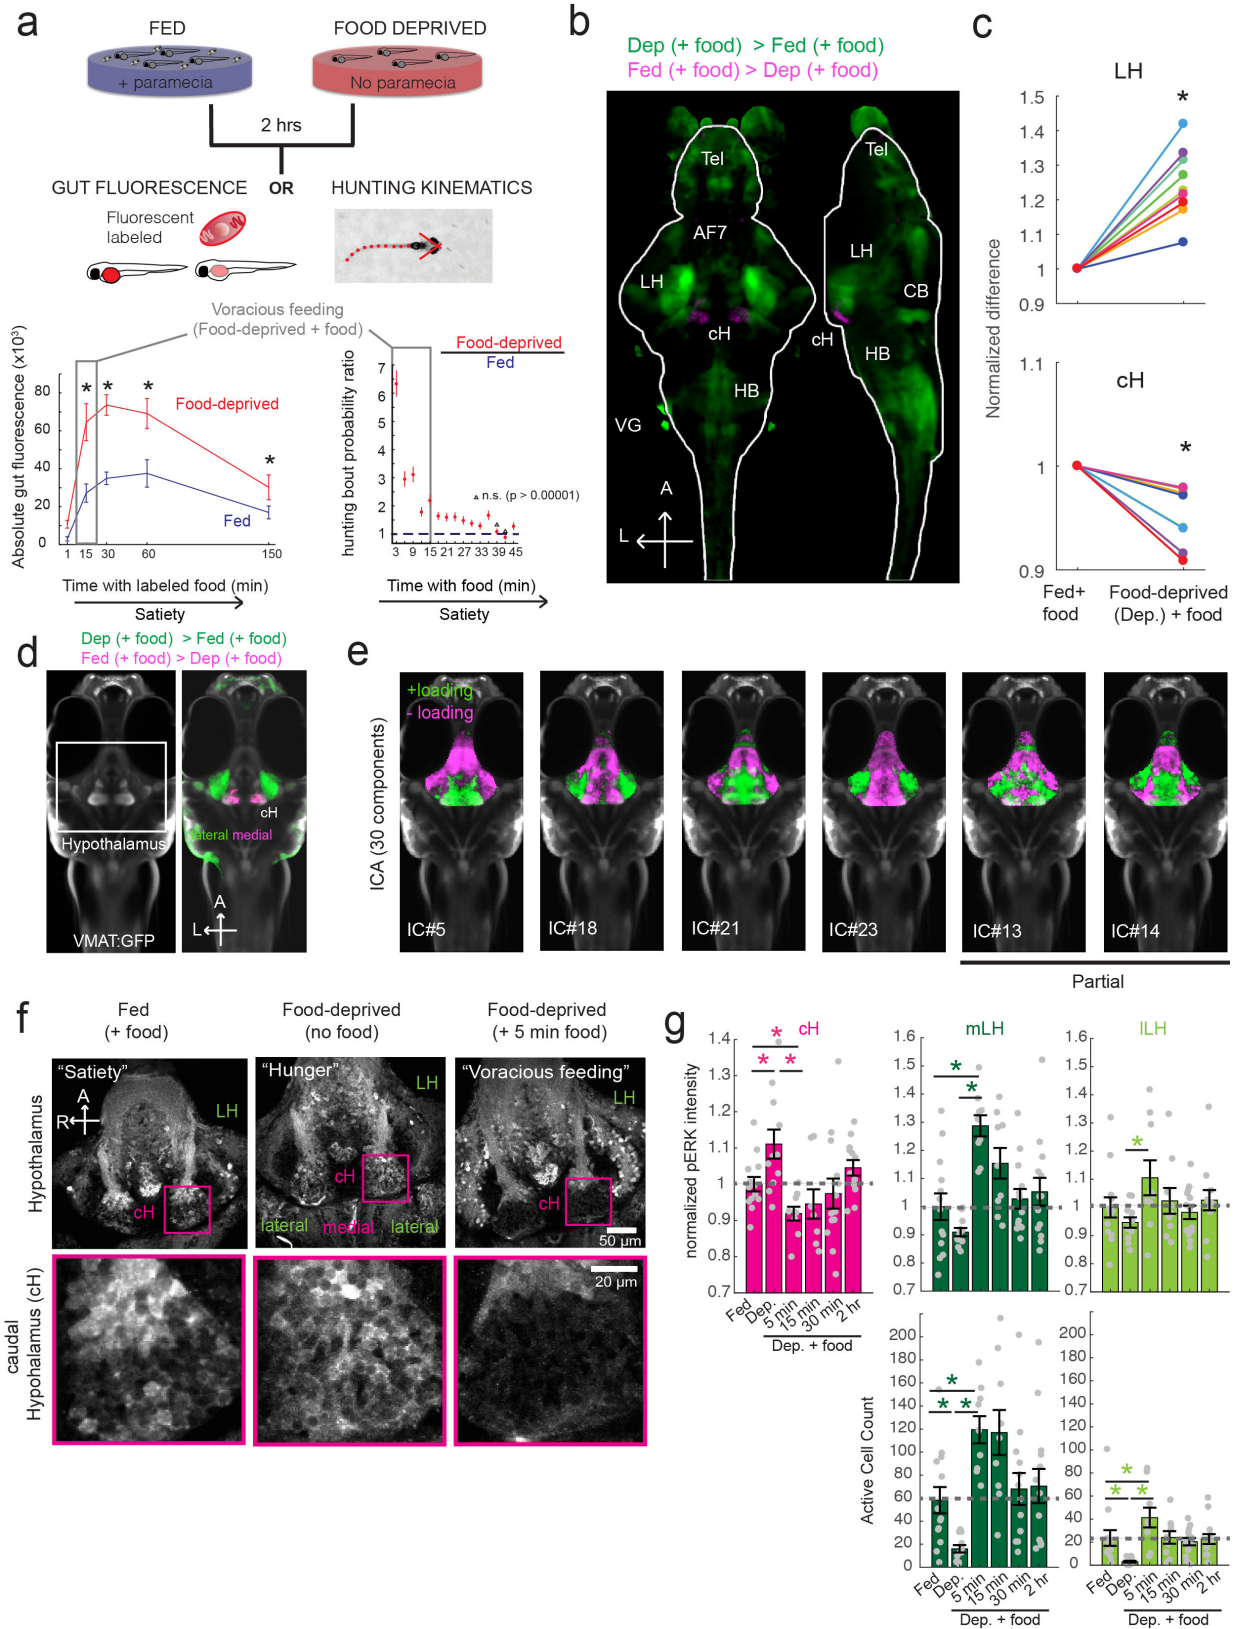

125  
126  
127  
128

**Figure 1 with 4 supplements: Whole brain activity mapping reveals anti-correlated hypothalamic clusters**

129 **(a)** Top: Schematic of protocols used to evaluate appetite behavior in larval zebrafish. At 7 or 8 dpf,  
130 larvae were either food-deprived for 2 hours, or fed with excess paramecia for this duration. After 2 hrs (2-  
131 4 hours in the case of behavioral imaging), they were subject to a quick wash, followed either by: 1)  
132 addition of excess fluorescent-labeled paramecia (left), 2) high-resolution behavioral imaging (right).  
133 **Bottom left:** Gut fluorescence measurements of food-deprived (red) or fed (blue) fish as a function of  
134 feeding duration. Groups of fed or food-deprived larvae were fixed at indicated time points after feeding of  
135 labeled paramecia (fed: n=7/18/19/17/17, food-deprived: n= 8/23/20/14/15). Food-deprived fish had  
136 significantly higher gut fluorescence than fed fish overall ( $p = 7.5859 \times 10^{-10}$ , Two-way ANOVA, asterisk  
137 indicates corrected  $p$ -values $<0.05$ ). **Bottom right:** The probability of performing a hunting-related swim  
138 bout across fed and food-deprived fish groups in 3-minute time bins over 45 minutes. Error bars represent  
139 90% confidence intervals. For all bins except those indicated with triangles, the null hypothesis that initial  
140 feeding condition has no effect on hunting-bout probability is rejected ( $p < 0.00001$ , Fisher's Exact Test  
141 comparing binomial probability distributions per bin). Fed: n =85655 bouts from 73 fish; Food-deprived n =  
142 75357 bouts from 57 fish. Since the rate of food intake and hunting behavior was highest in the first 15  
143 minutes (voracious feeding phase, gray boxes), we chose this time point for subsequent MAP-mapping  
144 experiments.

145 **(b)** Brain-wide activity mapping of food-deprived (Dep.) and fed fish, in response to food. Data from 9  
146 experiments (n = 557 fish total) were combined to generate this map. Activated regions include the  
147 telencephalon (Tel), Arborization field 7 (AF7), cerebellum (CB), hindbrain (HB), Vagal ganglion (VG) and  
148 lateral lobe of the intermediate hypothalamus (LH). Suppression was observed in the caudal  
149 hypothalamus (cH) and some parts of the telencephalon. Scale bar = 100  $\mu\text{m}$ . Also see Video 1.

150 **(c)** ROI-specific analysis of LH and cH regions in 9 independent MAP-mapping experiments (20-30 fish  
151 per treatment per experiment). Food-deprived fish constantly had higher LH and lower cH activity in  
152 response to food ( $p=0.0039$  for both cH and LH, Wilcoxon Signed Rank Test).

153 **(d)** Z-projection of same MAP-map showing the hypothalamus, where lateral regions (i.e. LH) are strongly  
154 activated and medial regions (e.g. cH) are suppressed. The map is overlaid on an anatomy stack for the  
155 transgenic line *Tg(etVMAT:GFP)* to highlight the location of cH neurons.

156 **(e)** Six examples of independent component analysis (ICA) maps. Voxels for each recovered independent  
157 component (IC) are shown as maximum projections, with intensity proportional to the z-score of the  
158 loadings of the ICA signal. These ICs, along with others (16/30) highlight LH and cH regions of opposite  
159 loadings, suggesting they may be part of a network with anti-correlated activity patterns. Positive (+)  
160 loading and Negative (-ve) loadings are reflected in green and magenta respectively.

161 **(f)** Higher resolution imaging of dissected brains stained with pERK during phases of feeding. Scale bar:  
162 50  $\mu\text{m}$ . Inset: Higher magnification view of cH neurons. Scale bar: Scale bar = 20  $\mu\text{m}$ . Fish were mounted  
163 ventral side up.

164 **(g)** Quantification of cH activity (normalized pERK fluorescence) and LH (medial LH and lateral LH)  
165 activity (normalized pERK fluorescence) (top) and # pERK-positive cells (bottom) in fed and food-  
166 deprived fish (n =13/11/9/9/13/12).

167 Normalized pERK intensity (cH/mLH/ILH): Fed vs Dep. ( $p = 0.016/0.17/0.17$ ), Dep. vs Dep + 5 min food  
168 ( $p=3.1 \times 10^{-4}/9.9 \times 10^{-5}/0.02$ ), Fed vs Dep. + 5 min food ( $p= 0.0097/0.001/0.08$ ).

169 Active Cell count (mLH/ILH): Fed vs Dep. ( $p = 0.001/0.0038$ ), Dep. vs Dep + 5 min food ( $p= 9.7 \times 10^{-5}/1.3 \times 10^{-5}$ ), Fed vs Dep. + 5 min food ( $p= 0.0038/0.048$ ). Asterisks denote  $p<0.05$ , one-tail Wilcoxon  
170 Rank Sum Test. Note that mean pERK intensity does not change as significantly as active cell count.  
171

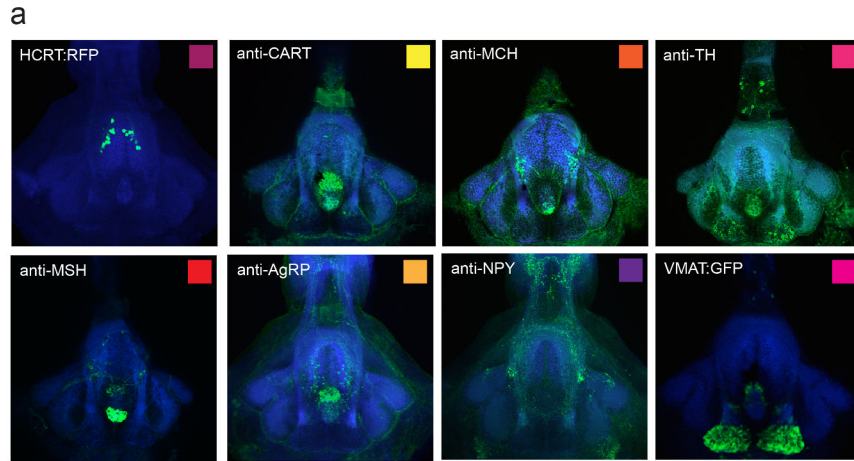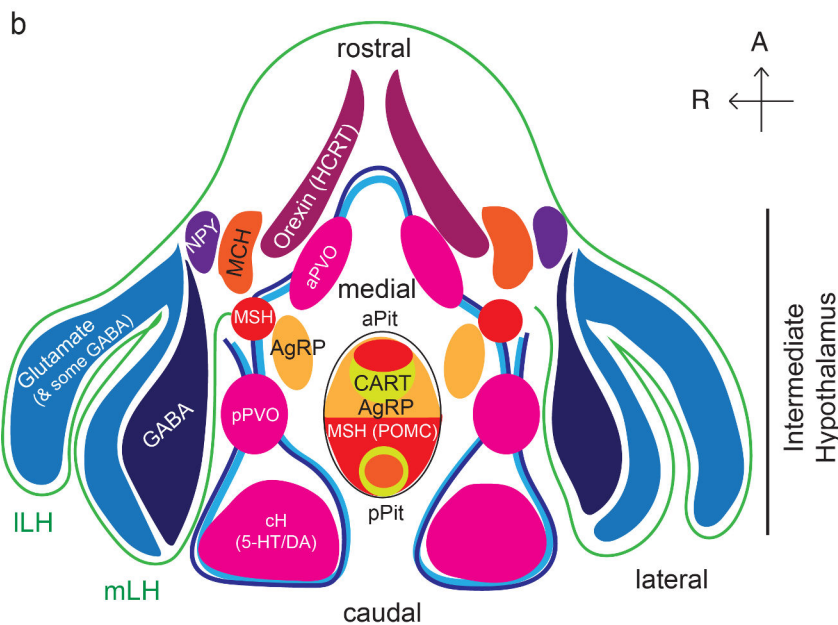

172  
173  
174  
175  
176  
177  
178  
179  
180  
181  
182  
183  
184  
185  
186  
187  
188  
189

**Figure 1 - Figure Supplement 1: Anatomical characterization of intermediate hypothalamus feeding areas**

**(a)** Expression patterns of a number of feeding-related peptides in the zebrafish hypothalamus, based on antibody-staining or transgenic labels. HCRT = hypocretin (orexin), CART = cocaine and amphetamine related transcript MCH = melanin-concentrating hormone, TH = tyrosine hydroxylase (labels dopaminergic and/or noradrenergic neurons), MSH = alpha-melanocyte stimulating hormone, AgRP = Agouti-related peptide, NPY = neuropeptide Y, VMAT = vesicular monoamine transporter (labels dopaminergic (DA) and serotonergic neurons (5-HT)). Note that MCH and HCRT staining is absent from the zebrafish LH. Though not apparent from the schematic, HCRT is located more dorsally. The preoptic area, which contains oxytocinergic as well as other peptidergic neurons, is located more dorsally and not reflected in this schematic.

**(b)** Schematic summarizing zebrafish hypothalamic peptide expression. GABA (dark blue) and glutamatergic (blue) neurons are found in the lateral hypothalamus (see Figure 1- Figure Supplement 2) and also throughout the medial regions of the hypothalamus. PVO = paraventricular organ, which also contains DA and 5-HT neurons. A number of peptidergic neurons are located within the anterior and posterior pituitary/hypophysis (aPit and pPit). Color code corresponds to images in (a). A = anterior, R = right.



190

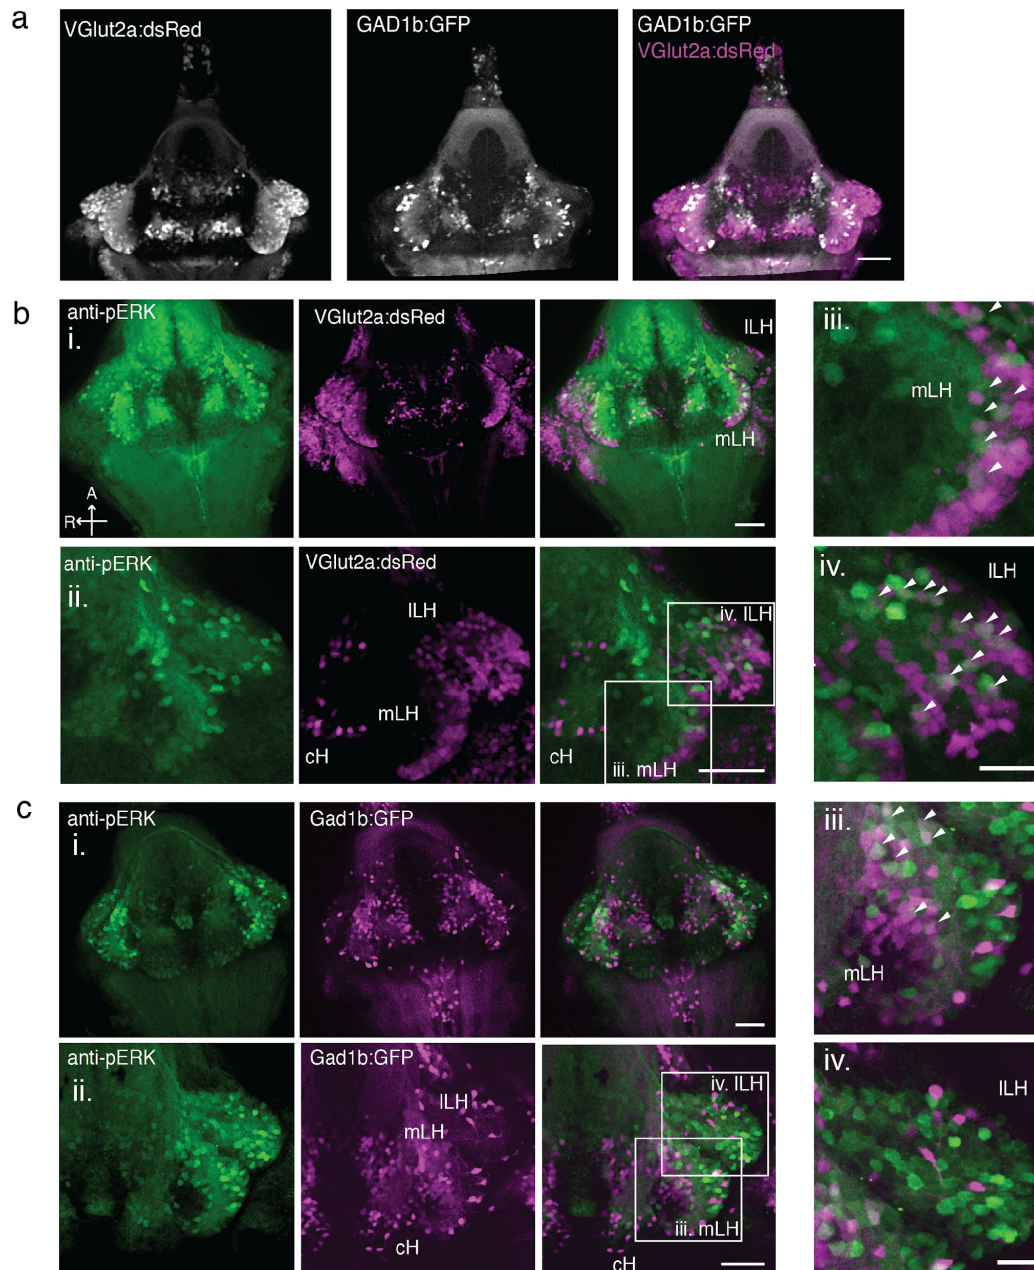

191

192

**Figure 1- Figure Supplement 2: Characterization of zebrafish LH**

193 **(a)** Glutamatergic and GABAergic neuron distribution in the hypothalamus. *Tg(VGlut2a:dsRed)* and  
 194 *Tg(GAD1b:GFP)* transgenic fish were dissected, imaged and registered onto a common reference  
 195 hypothalamus.

196 **(b)** Glutamatergic cells, labeled by *Tg(VGlut2a:dsRed)*, overlap with active (pERK-positive) neurons in  
 197 both the ILH and outer rim of the mLH. (i) Overview of hypothalamus. (ii) Higher magnification images of  
 198 LH. (iii-iv) Inset showing overlap of ILH and outer rim of mLH with glutamatergic cells.

199 **(c)** GABAergic cells, labeled by *Tg(Gad1b:GFP)*, overlap with active neurons in the inner rim of the mLH  
 200 but not the ILH. (i) Overview of hypothalamus. (ii) Higher magnification images of LH. (iii-iv) Inset showing  
 201 overlap of inner rim of mLH with GABAergic cells. White arrows point to examples of overlapping cells.

202 All fish were mounted ventral side up. Scale bar = 50 µm. Inset scale bar = 20 µm.

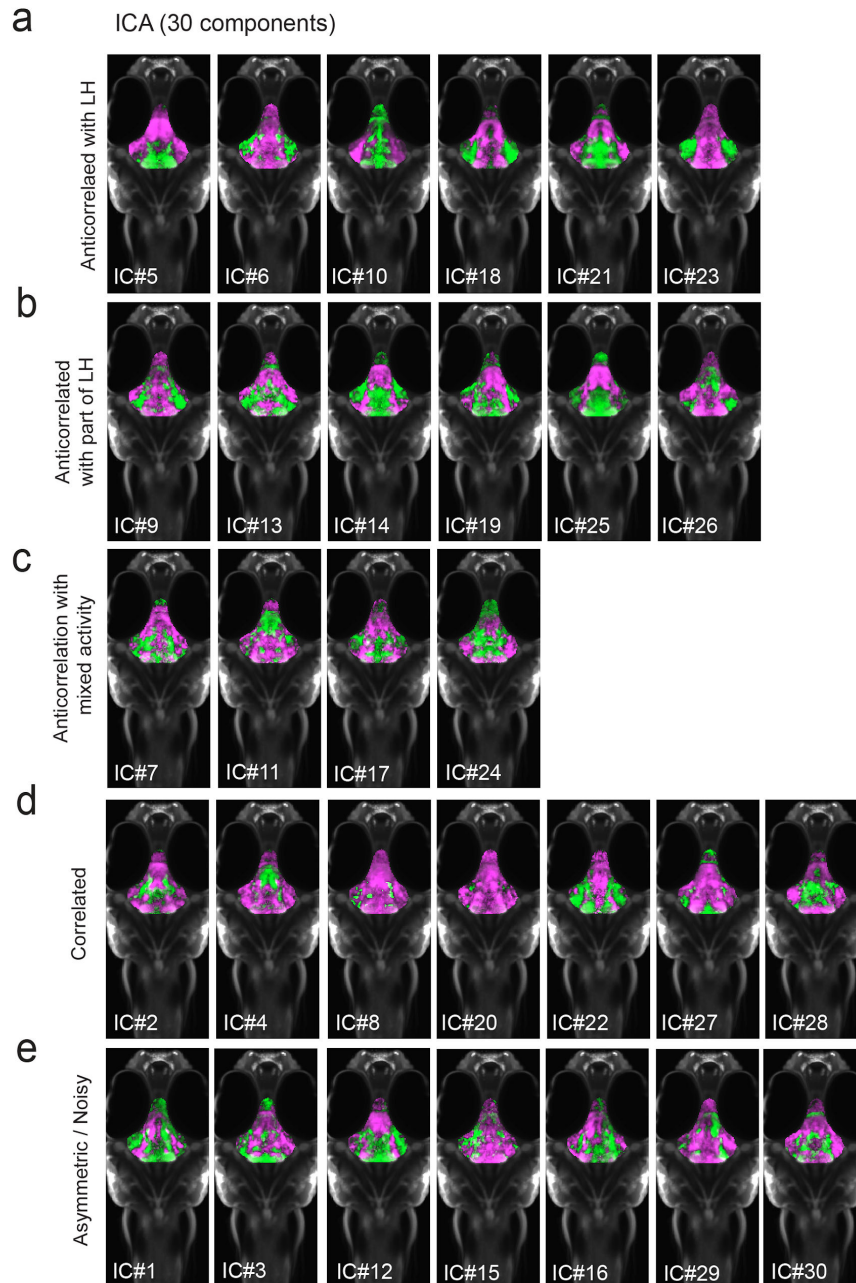

203  
204  
205  
206  
207  
208  
209  
210  
211  
212  
213

**Figure 1- Figure Supplement 3: All 30 independent components extracted from ICA analysis.** This method separates pERK signals into statistically independent components based on their correlated activity, thus identifying putative functional connectivity (both positive or negative relationships) between different brain regions (Randlett et al., 2015; see Methods). To increase the robustness of the analysis, we included fish from other feeding-related treatments that we did not otherwise use in this manuscript (n = 904 fish total).

**(a-c)** From this analysis, we identified multiple independent component networks (ICs) in which at least part of the LH displayed an inverse activity relationship (i.e. opposite loadings) with the cH (16/30).

**(d)** 7/30 ICs had correlated LH and cH activity.

**(e)** The other 7/30 had asymmetrical or noisy activity patterns.

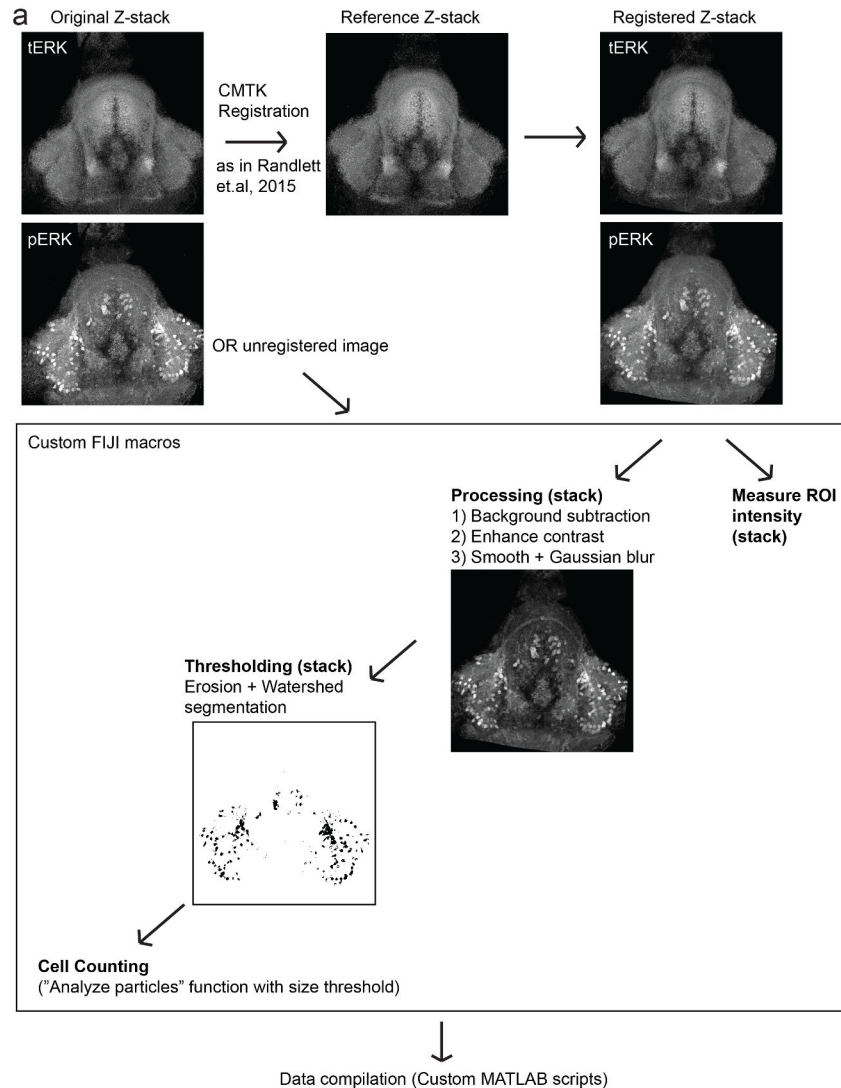

214

## 215 **Figure 1 – Figure supplement 4: Automated quantification of pERK-positive cells**

216 **(a)** Method by which we quantify pERK-positive (“active”) cell count in a high-throughput manner. This  
217 method works best with high-resolution images (i.e. dissected brains). Brain stacks are registered onto a  
218 reference brain within the same dataset, using the tERK channel, though there is the option of using  
219 unregistered images (for which individual ROIs have to be defined for each image). A series of  
220 processing steps allows for automated segmentation of pERK-positive cells using the same manually  
221 optimized threshold across the entire dataset.

222

## 223 **Cellular dissection of hypothalamus neural activity reveals modulation by satiation state**

224 To probe neural activity changes with higher resolution, we performed pERK staining in

225 dissected brains, and examined the activity of these populations in time course experiments that

226 spanned the period of food-deprivation and subsequent feeding (Figure 1f-g, Figure 2). We

227 quantified changes in mean cellular fluorescence as well as changes in the number of active  
228 cells or cell clusters (Figure 1 - Figure Supplement 4). While the high density of labeled cells  
229 and high background fluorescence in the cH made the identification of individual neurons  
230 difficult, we found that in the LH segmentation of individual neurons and classifying activity  
231 based on the thresholded fluorescence levels provided a cleaner and more reliable readout for  
232 overall neuronal activity. Using these respective metrics, we observed that mean fluorescence  
233 in the cH was predictably high in food-deprived fish, while the number of active neurons in the  
234 medial and lateral lobes of the LH (mLH and ILH, respectively) was low when compared to  
235 continuously fed animals. However, within 5 minutes of food presentation, cH activity fell  
236 dramatically to a level significantly below that observed in continuously fed fish (Figure 1f). This  
237 characteristically low cH activity level was accompanied by a large increase in LH mean  
238 fluorescence and neuron activity, which is consistent with our MAP-mapping results. As the  
239 feeding period continued, LH neuronal activity declined and, reciprocally, cH activity increased,  
240 coincident with the decline in voracious hunting and food ingestion (Figure 1f). After two hours,  
241 neural activity in the cH and LH and feeding behavior all converged onto baseline levels similar  
242 to those observed in continuously fed fish (Figure 1f). Thus these two neuronal populations  
243 display anti-correlated activity patterns over time frames that span the progression of hunger  
244 during food-deprivation, voracious feeding and the gradual return to satiety.

#### 245 ***Satiation state influences the sensitivity of cH and LH populations to food***

246 The neural activity patterns described above suggest that cH and LH activity may report the  
247 satiation state of the animal. To better align these patterns with the animal's internal state, we  
248 examined these loci over a time course that started with food removal from well-fed animals,  
249 followed by food presentation after a variable food-deprivation period (30 min or 2 hours, Figure  
250 2). We found that food removal resulted in a reduction of the number of active mLH and ILH  
251 neurons within 30 minutes. In contrast, cH activity gradually increased, with a significantly  
252 higher level of activity occurring between 30 min and 2 hours post-food removal. A possible

253 interpretation of these patterns is that LH activity is directly driven by the presence of food cues  
254 (as noted by Muto et al 2017), whereas the level of activity observed in cH neurons is a  
255 correlate of the animal's nutrient/caloric deficit and resulting hunger state in the absence of food,  
256 possibly even generating the signal necessary to sensitize the LH's responsiveness to such  
257 stimuli.

258         Food presentation not only rapidly reverses the activity patterns of both loci, but also  
259 does so in a manner correlating with the length of food-deprivation. Indeed, fish that had been  
260 food-deprived for longer periods (2-4 hrs) displayed a relatively enhanced induction of LH  
261 activity upon the introduction of food. Likewise, the reduction in cH activity on food presentation  
262 was significantly more pronounced when it followed a longer period of prior deprivation; both of  
263 these neural responses were strongly correlated with enhanced food consumption (voracious  
264 feeding; Figure 2, Figure 2 – Figure Supplement 1). As prey continues to be consumed, activity  
265 in both loci gradually reverts back to the baseline levels representative for fed animals (Figure  
266 1f-g, 2d).

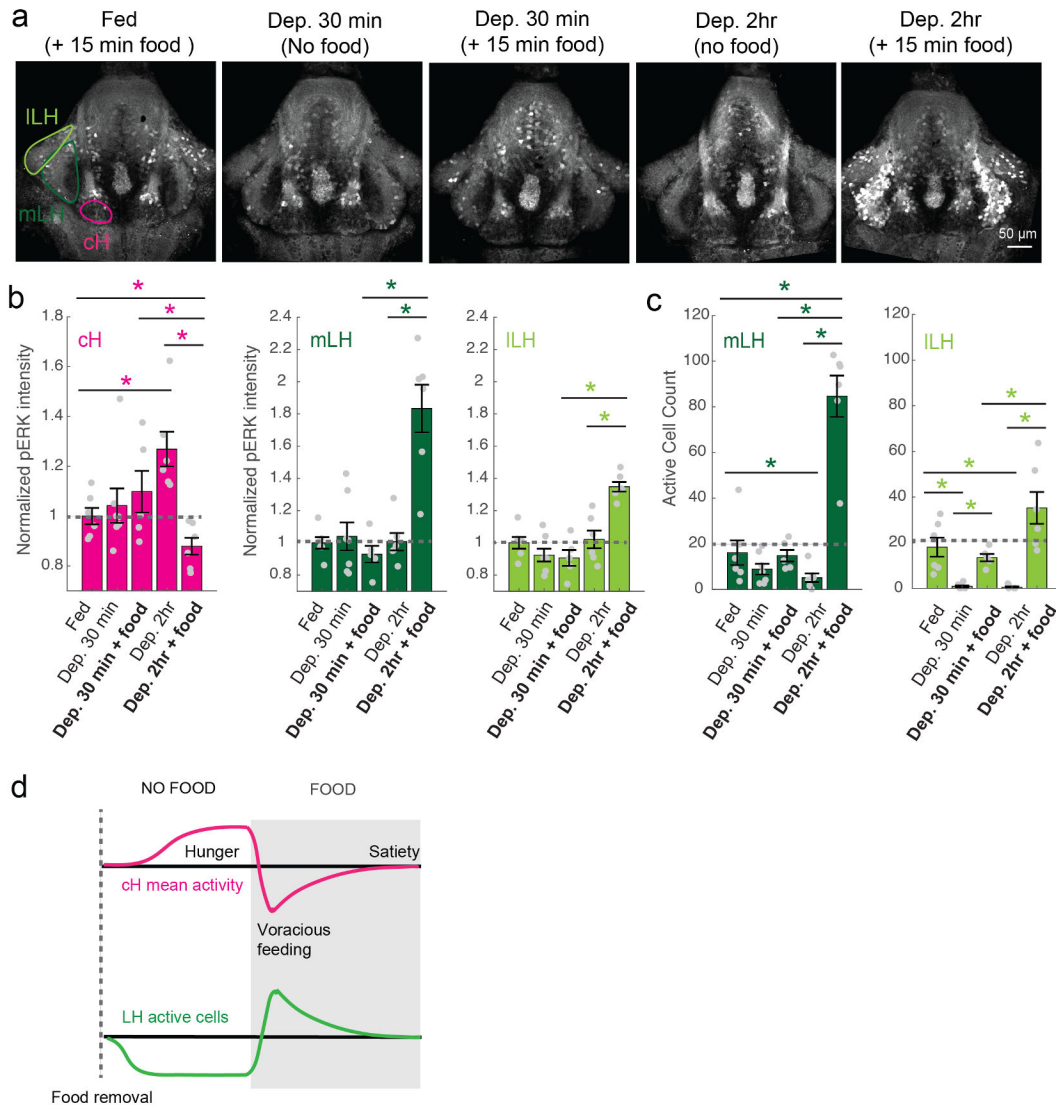

267  
268  
269  
270  
271  
272  
273  
274  
275  
276  
277  
278  
279  
280  
281  
282  
283  
284

**Figure 2 with 5 supplements: cH and LH activities are modulated by food and satiation state**

**(a)** Representative images showing how cH and LH activity in the presence and absence of food vary with the extent of food-deprivation, from the same dataset quantified below.

**(b)** Normalized pERK intensity in the cH increases with food-deprivation, whereas normalized LH pERK intensity does not change significantly, except during voracious feeding (Dep. 2 hr + food). Normalized pERK intensity (cH/mLH/ILH): Fed vs Dep. 2 hr ( $p = 0.0022/0.41/0.59$ ), Fed vs Dep. 2 hr + food ( $0.047/0.0011/0.0011$ ), Dep. 30 min + food vs Dep. 2 hr + food ( $p = 0.041/0.0022/0.0022$ ), Dep. 2 hr vs Dep. 2 hr + food ( $p = 0.0022/0.0011/0.0022$ ).

**(c)** The number of active LH (particularly ILH) cells decline within 30 min of food deprivation, and is significantly enhanced during feeding, particularly after a longer period of food-deprivation. Active cell count (mLH/ILH): Fed vs Dep. 30 min ( $p = 0.155/5.8 \times 10^{-4}$ ), Fed vs Dep. 2 hr ( $p = 0.047/0.011$ ), Dep. 30 min + food vs Dep. 2 hr + food ( $p = 0.0022/0.0043$ ), Dep. 30 min vs Dep. 30 min + food ( $p = 0.07/0.013$ ), Dep. 2 hr vs Dep. 2 hr + food ( $p = 0.0011/0.0011$ ), Fed vs Dep. 2 hr + food ( $p = 0.0022/0.07$ ),  $n = 6/7/5/6/6$  fish, One-tail Wilcoxon Rank Sum Test.

**(d)** Schematic of inferred cH and LH activity over phases of feeding. LH active cell count appears to decline more rapidly than the rise in cH activity. More supporting data can be found in the supplements.

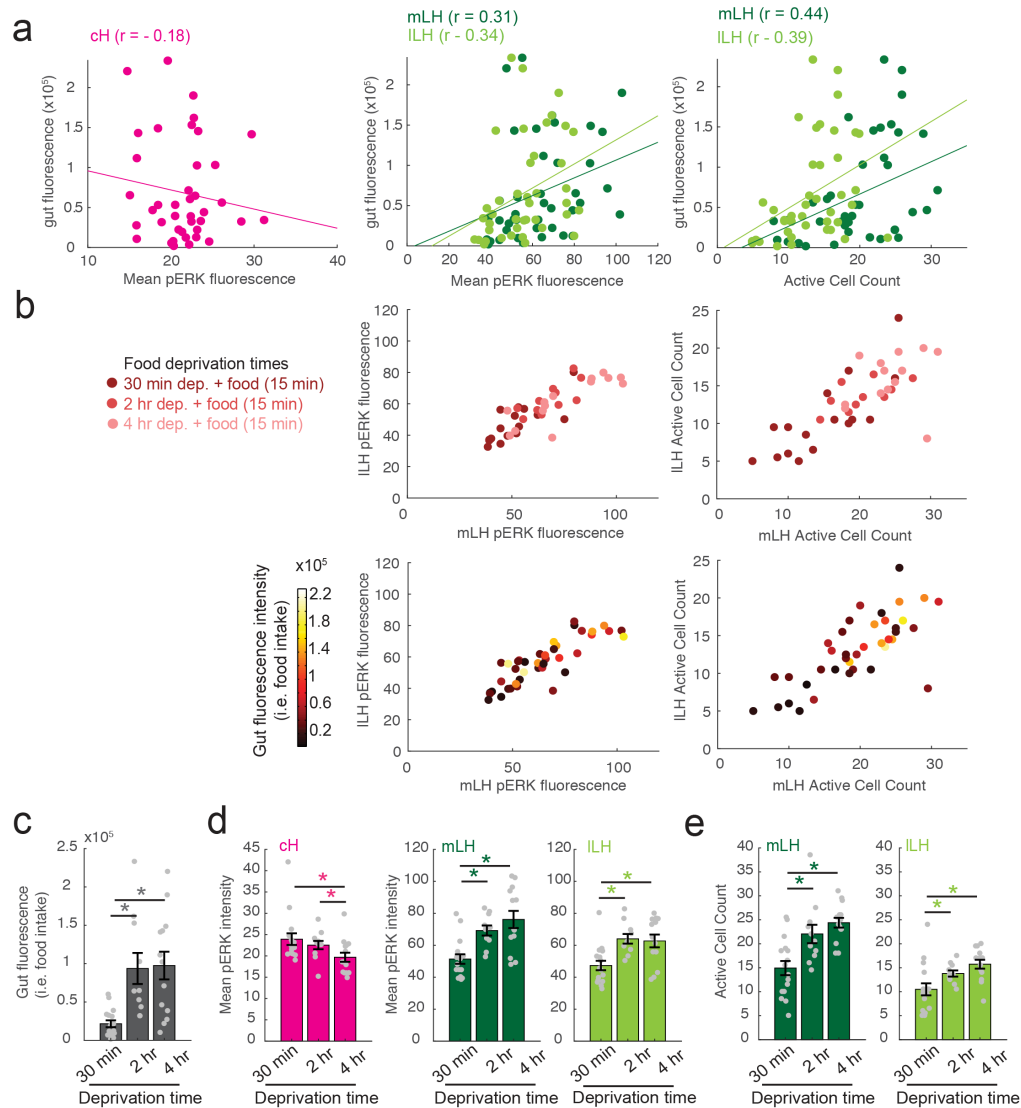

**Figure 2 - Figure Supplement 1: Additional data showing modulation of cH and LH by satiation state, and correlation with food intake**

**(a)** Gut fluorescence (i.e. food intake) as a function of mean cH pERK fluorescence, mean LH (mLH and ILH) pERK fluorescence and active cell count. Each datapoint represents a single fish.

**(b) Top:** mLH and ILH mean pERK fluorescence (left) and active cell count (right) as a function of food-deprivation time (denoted by color intensity). **Bottom:** mLH and ILH mean fluorescence (left) and cell count (right) as a function of gut fluorescence (i.e. food intake) after 15 min of feeding (denoted by color intensity).

**(c-e)** Quantification of gut fluorescence, cH and LH mean pERK fluorescence and LH active cell count across different food deprivation times (30 min, 2 hr and 4 hr). Note that in this dataset, these fish brains have been stained individually, which may have affected cH quantification.

**(c)** Food intake: 30 min vs 2 hr dep. ( $p = 2.8 \times 10^{-4}$ ), 30 min vs 4 hr dep. ( $p = 4.0 \times 10^{-4}$ ), 2 hr vs 4 hr dep. ( $p = 0.56$ ). Asterisk denotes  $p < 0.05$ ,  $n = 16/11/14$  fish, One-tail Wilcoxon Rank Sum Test.

**(d)** Mean pERK fluorescence (cH/mLH/ILH): 30 min vs 2hr dep. ( $p = 0.60/0.001/5.9 \times 10^{-4}$ ), 30 min vs 4 hr dep. ( $p = 0.084/8.6 \times 10^{-4}/0.058$ ), 2 hr vs 4 hr dep. ( $p = 0.02/0.24/0.54$ )

**(e)** Active cell count (mLH/ILH): 30 min vs 2 hr dep. ( $p = 0.0073/0.0094$ ), 30 min vs 4 hr dep. ( $p = 1.6 \times 10^{-4}/0.0017$ ), 2 hr vs 4 hr dep. ( $p = 0.056/0.053$ ).

285  
286  
287  
288  
289  
290  
291  
292  
293  
294  
295  
296  
297  
298  
299  
300  
301  
302  
303

304           Given the indirect nature of activity mapping in post-fixed animals, as above, we  
305 employed *in vivo* calcium imaging to measure cH and LH neuronal activities during food  
306 deprivation in real time (Figure 2 - Figure Supplement 3-5). Two transgenic Gal4 drivers,  
307 *Tg(116A:Gal4)* and *Tg(76A:Gal4)*, were used to drive expression of GCaMP6s  
308 (*Tg(UAS:GCaMP6s)*) in large subsets of cH and LH neurons (Figure 2 - Figure Supplement 2-  
309 3). The 116A:Gal4 transgene drives expression mainly in serotonergic neurons in the cH  
310 ( $88.9\pm 0.8\%$  5-HT positive) and paraventricular organ (PVO; Figure 2- Figure Supplement 2),  
311 whereas 76A:Gal4 drives expression in a large proportion of LH cells (Figure 2 - Figure  
312 Supplement 3, Muto et al., 2017). Consistent with our pERK results, the initial calcium-mediated  
313 mean fluorescence and firing frequency of a subset of cH neurons scaled with the length of  
314 food-deprivation prior to imaging (Figure 2- Figure Supplement 3d), and increased further as  
315 food-deprivation continued over the 2 hr imaging period (Figure 2 - Figure Supplement 3-5).  
316 The largest rate of increase occurred during the initial hour of food-deprivation (Figure 2 - Figure  
317 Supplement 3-5).

318           Analysis of LH activity gave more diverse results over the course of the food-deprivation  
319 time course. While some mLH and ILH voxels showed a predicted reduction in baseline  
320 fluorescence and firing rate, many others displayed a significant enhancement of baseline  
321 activity. It is possible that these changes reflect real dynamics in certain cellular or neuropil  
322 subtypes within the LH, or that they are artifacts of head fixation. Despite the significant diversity  
323 in response properties within the LH, we still observe, in line with our expectations, an overall  
324 negative correlation of ILH calcium spikes with the mean value of cH fluorescence (Figure 2 -  
325 Figure Supplement 4 and 5).

326  
327



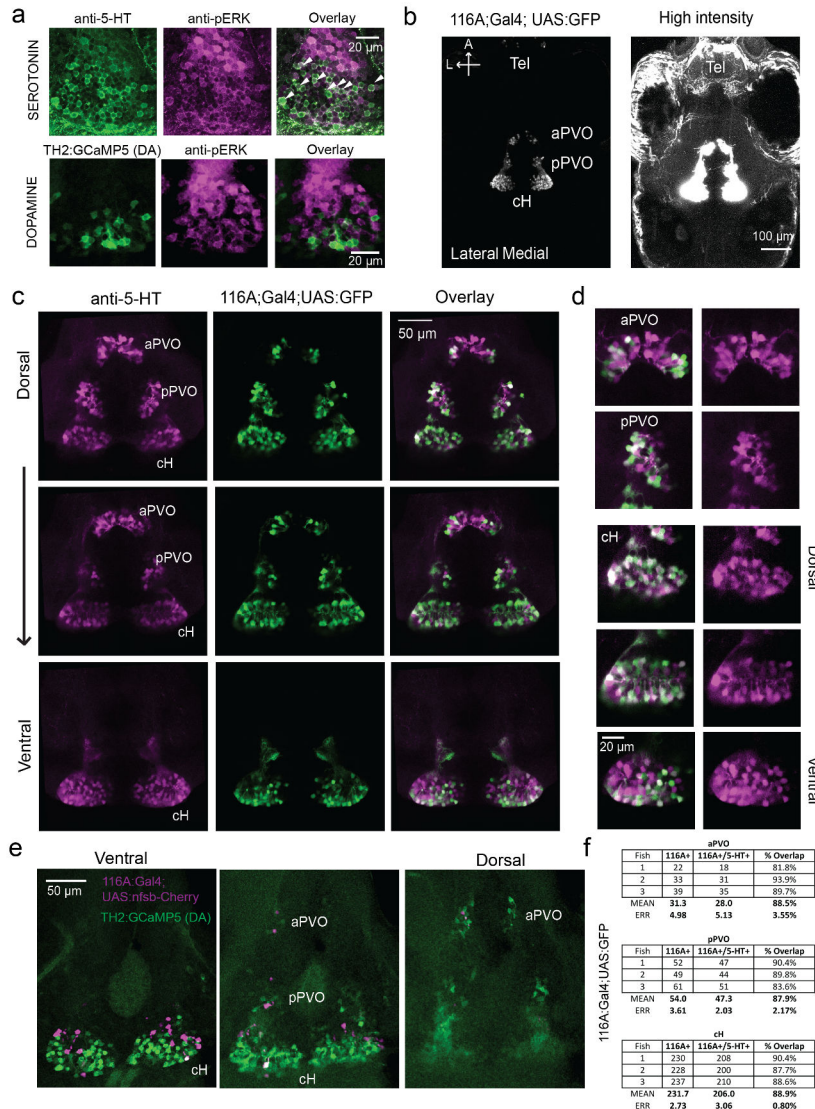

328  
329  
330  
331  
332  
333  
334  
335  
336  
337  
338  
339  
340  
341  
342  
343  
344

**Figure 2 - Figure Supplement 2: Characterization of the cH and 116A:Gal4 line**

**(a)** pERK-positive cH cells overlaps with anti-5-HT immunostaining and *Tg(116A:Gal4)* cells, and less with *Tg(TH2:GCaMP5)* (i.e. dopaminergic) cells. Scale bar = 20 $\mu$ m. White arrows point to examples of overlapping cells.

**(b)** Z-projection images of whole mount *Tg(116A:Gal4;UAS:GFP)* fish at low (left) and high (right) intensities. Scale bar = 100  $\mu$ m.

**(c)** Overlap of *Tg(116A:Gal4;UAS:GFP)* with anti-5-HT immunostaining is seen in all layers of the caudal hypothalamus, and also the anterior and posterior paraventricular organ (aPVO and pPVO). Each row shows a different Z-plane, moving from more dorsal to more ventral. Scale bar = 50  $\mu$ m.

**(d)** Higher magnification images of cH, aPVO and pPVO from left side of image in **(c)**.

**(e)** Minimal overlap of *Tg(116A:Gal4;UAS:nfsb-mCherry)* with dopamine neurons labeled by *Tg(TH2:GCaMP5)*. Note that the *Tg(116A:Gal4;UAS:nfsb-mCherry)* transgenic, which is used in ablation experiments, shows sparser labeling than with *Tg(UAS:GFP)*. Scale bar = 50  $\mu$ m.

**(f)** Quantification of 5-HT overlap with *Tg(116A:Gal4;UAS:GFP)* in the cH, aPVO and pPVO.

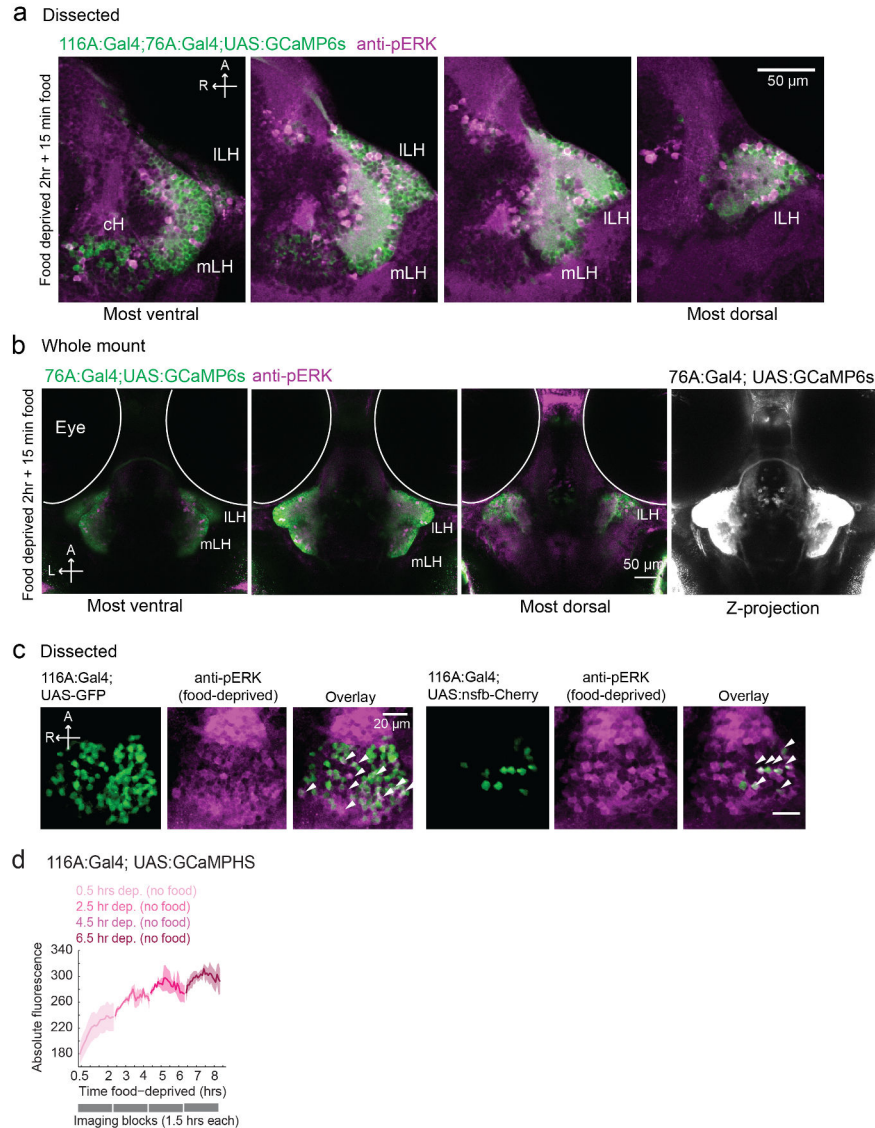

345  
 346  
 347  
 348  
 349  
 350  
 351  
 352  
 353  
 354  
 355  
 356  
 357  
 358  
 359  
 360

**Figure 2 - Figure Supplement 3: 116A and 76A:Gal4 expression overlap with pERK activity**

**(a)** mLH and ILH activity in voraciously-feeding fish overlaps with *Tg(76A:Gal4;UAS:GCaMP6s)* expression (dissected brains). All visible pERK-positive neurons were also co-labeled with GCaMP6s. *Tg(116A:Gal4)* is also expressed. Scale bar = 50  $\mu$ m.

**(b)** mLH and ILH activity in voraciously-feeding fish overlaps with *Tg(76A:Gal4;UAS:GCaMP6s)* expression (whole-mount). All visible pERK-positive neurons were also co-labeled with GFP. Note that more dorsally and anteriorly other neurons beyond the LH are labeled. Scale bar = 50  $\mu$ m.

**(c)** pERK positive cells (food-deprived fish) overlap partially with *Tg(116A:Gal4)* expression. Left: *Tg(116A:Gal4;UAS:GFP)* Right: *Tg(116A:Gal4;UAS:nfsb-mCherry)*. Scale bar = 20  $\mu$ m.

**(d)** Mean cH activity (*Tg(116A:Gal4;UAS:GCaMP6s)*) increases as a function of food-deprivation time. Larvae were food-deprived for 0.5, 2.5, 4.5 or 6.5 hours ( $n = 12/4/4/8$ ), quickly embedded in agarose and subsequently imaged for 1.5 hours (every 5 minutes) under a confocal microscope. See Figure 2 - Figure Supplement 4-5 for simultaneous calcium imaging of cH and LH activity at higher temporal resolution.

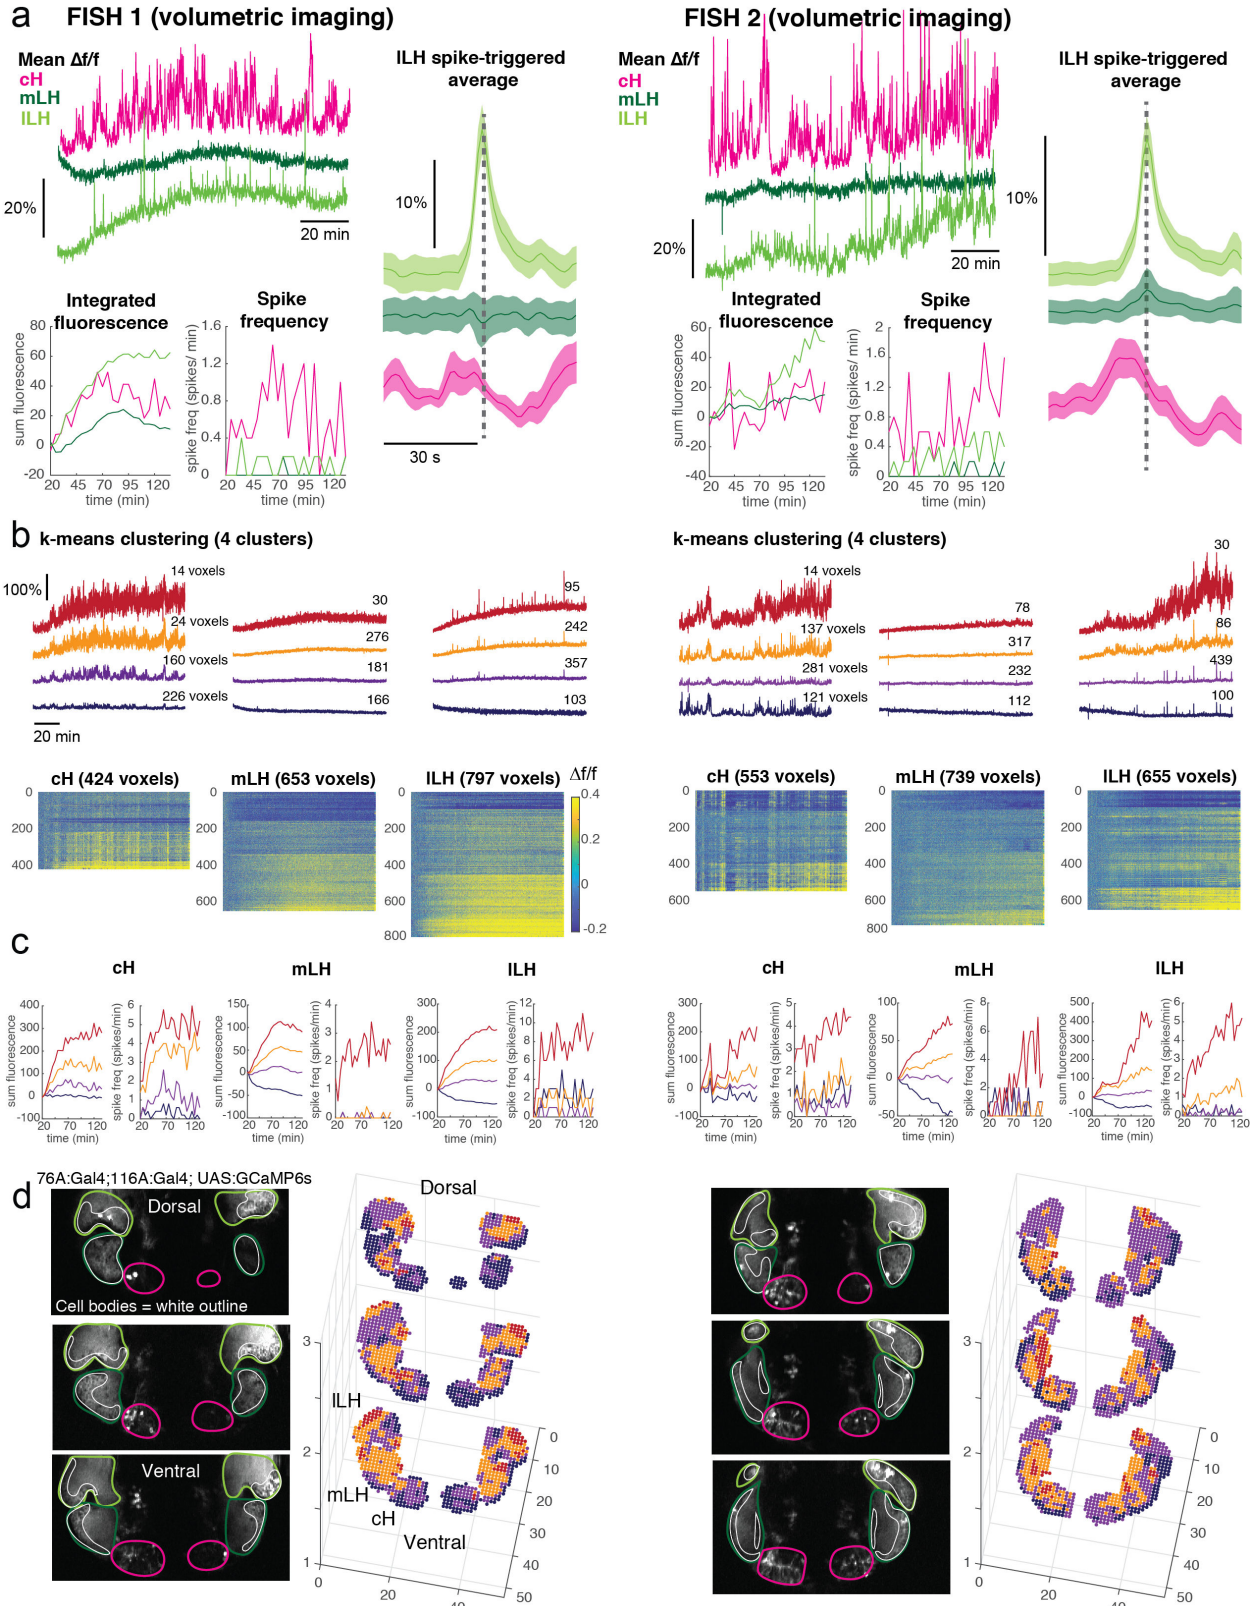

Figure 2 - Figure Supplement 4: Calcium imaging of cH and LH over food-deprivation reveal complex dynamics (volumetric imaging)

361  
362  
363

364 (a) Two fish (left and right) are shown. **Top left:** Mean  $\Delta f/f$  across the entire cH, mLH and ILH;  
365 **Bottom left:** calcium dynamics (integrated (sum) fluorescence and calcium spike frequency, 5 min  
366 bins) over the course of a 2 hr long imaging session. Fish were imaged ~20 min after embedding,  
367 thus initial food-deprivation time is 20 min. **Right:** Spike-triggered averages based on ILH calcium  
368 spikes reveal an accompanying reduction in cH calcium fluorescence ( $\Delta f/f$ ), suggesting opposing  
369 activity patterns.

370 (b) **Top:** K-means clustering ( $k=4$ ) over all cH and LH voxels reveals diverse clusters of activity.  
371 Number of voxels within each cluster is indicated next to the mean  $\Delta f/f$  trace. **Bottom:** Raster plots of  
372 clustered neurons sorted from the least active (blue) to most active (red) cluster.

373 (c) Calcium dynamics (integrated fluorescence and spike frequency) for each cluster over time reveal  
374 diverse activity patterns (5 min bins).

375 (d) **Left:** Average intensity projection images showing imaged regions. Cell bodies are outlined in  
376 white; for the LH they tend to correspond to the edges, whereas neuropil are more concentrated in  
377 the center. The cH comprises mainly cell bodies. **Right:** Positions of voxels corresponding to each  
378 cluster. Fish 2 is imaged at more ventral planes than fish 1.  
379

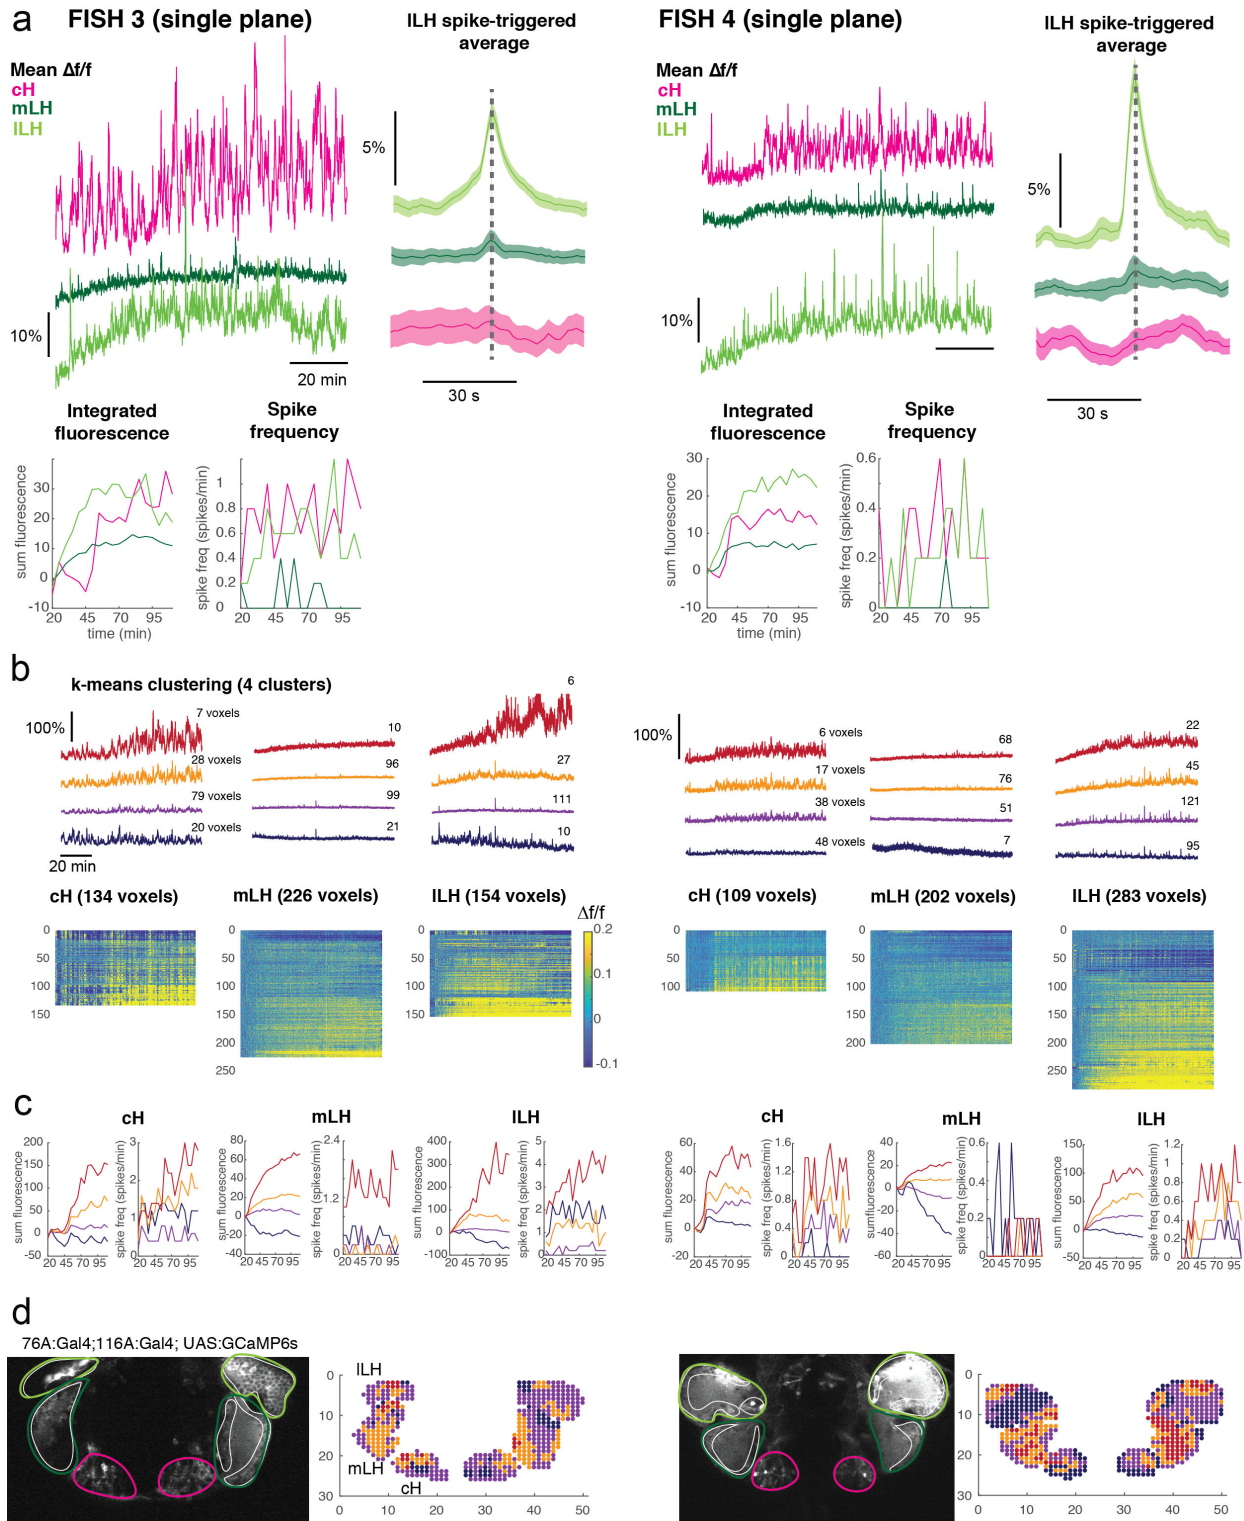

380  
381  
382  
383  
384  
385

**Figure 2 - Figure Supplement 5: Calcium imaging of cH and LH over food-deprivation reveal complex dynamics (single plane)**

**(a)** Two fish (left and right) are shown. **Top left:** Mean  $\Delta f/f$  across the entire cH, mLH and ILH; **Bottom left:** calcium dynamics (integrated (sum) fluorescence and calcium spike frequency, 5 min bins) over the

386 course of a 2 hr long imaging session. Fish were imaged ~20 min after embedding, thus initial food-  
387 deprivation time is 20 min. **Right:** Spike-triggered averages based on ILH calcium spikes reveal an  
388 accompanying reduction in cH calcium fluorescence ( $\Delta f/f$ ). As only a single-plane was imaged, the  
389 inverse relationship between the cH and LH is not as prominent.  
390 **(b) Top:** K-means clustering ( $k=4$ ) over all cH and LH voxels reveals diverse clusters of activity. Number  
391 of voxels within each cluster is indicated next to the mean  $\Delta f/f$  trace. **Bottom:** Raster plots of clustered  
392 neurons sorted from the least active (blue) to most active (red) cluster.  
393 **(c)** Calcium dynamics (integrated fluorescence and spike frequency) for each cluster over time reveal  
394 diverse activity patterns (5 min bins).  
395 **(d) Left:** Average intensity projection images showing imaged regions. Cell bodies are outlined in white;  
396 for the LH they tend to correspond to the edges, whereas neuropil are more concentrated in the center.  
397 The cH comprises mainly cell bodies. **Right:** Positions of voxels corresponding to each cluster. Since  
398 these fish were not embedded completely symmetrically, the left and right sides of the hypothalamus are  
399 at slightly different dorsal-ventral positions (right sides slightly more dorsal than left sides). Fish 3 is  
400 imaged at a more ventral plane than fish 4.

401  
402 ***The caudal and lateral hypothalamus respond to food sensory cues and are anti-***  
403 ***correlated over short timescales***

404 We next examined the effects of food sensory cues on cH and LH activity dynamics by  
405 performing calcium imaging on tethered animals during the controlled presentation of food-  
406 related stimuli (Figure 3a). Consistent with the above results of pERK analysis of post-fixed  
407 brains, mLH and ILH neurons were strongly activated and cH neurons suppressed within  
408 seconds of paramecia addition to the water in the vicinity of a food-deprived fish (Figure 3b-c).  
409 Interestingly, neurons in all three hypothalamic loci responded to water flow alone (Figure 3b-c),  
410 with the cH and ILH responding more strongly than the mLH (Figure 3c, bottom panels).  
411 However, these responses were still significantly less than when paramecia were presented  
412 (Figure 3c, bottom panels). Thus, food (and other) sensory cues in the absence of hunting or  
413 food ingestion differentially modulate the activities of neurons in the caudal and lateral  
414 hypothalamic lobes.

415 We also observed that, across periods in which food cues were either present or absent,  
416 the activities of cH and LH neurons were remarkably anti-correlated; both spontaneous or food-  
417 induced fluctuations in one population were accompanied by a corresponding opposing change  
418 in the other (Figure 3b). This observation was supported by cross-correlation analysis between

419 cH, mLH and ILH voxels (Figure 3d-f), which revealed high correlation within the same  
420 hypothalamic region (red), and anti-correlation between cH and LH regions (blue) (Figure 3d-e).  
421 Further, ILH voxels showed more spatial heterogeneity than mLH voxels (Figure 3e), though a  
422 small cluster of cells at the most-anterior part of the ILH was found to be consistently anti-  
423 correlated with the cH (Figure 3e, Fish C and D, for example). When ranked according to their  
424 degrees of anti-correlation with voxels from other lobes, the cH and ILH appeared to show the  
425 greatest anti-correlation (Figure 3f). Overall, these results indicate that cH and LH neurons  
426 display generally anti-correlated activity over short timescales in addition to longer epochs  
427 reflecting states of hunger, voracious feeding and satiety.

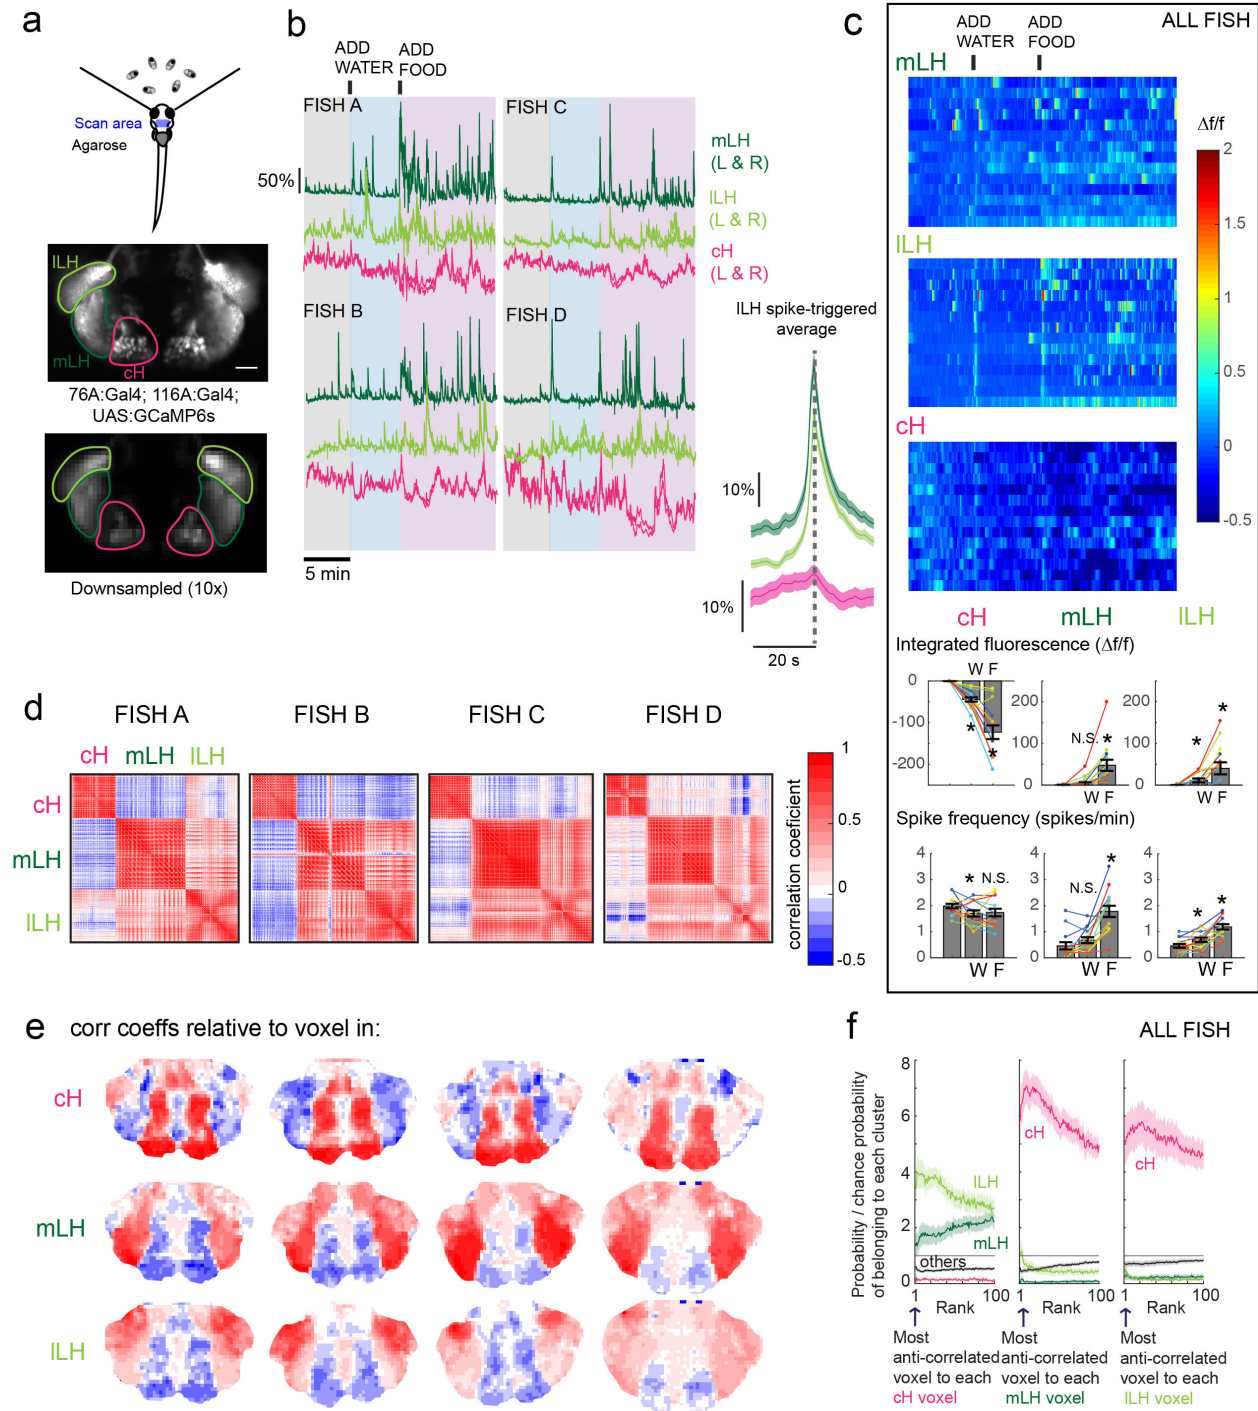

428

429 **Figure 3: Anti-correlation on seconds timescale**

430 **(a) Top:** Schematic showing the calcium imaging setup. Transgenic fish with GCaMP-labeled cH and LH  
 431 neurons were paralyzed, tethered in agarose with their eyes and nostrils freed, and exposed to live  
 432 paramecia. **Top image:** GCaMP expression in the cH and LH driven by two transgenic lines. **Bottom**  
 433 **image:** Downsampled image stack used for analysis  
 434 **(b) Left:** Mean calcium activity from respective hypothalamic ROIs (shown in (i)) from 4 example fish after  
 435 exposure to water (control) or paramecia. Left and right lobes are shown in same color and overlaid.



436 Paramecia presentation activates the LH and suppresses the cH, which show opposing activity on short  
437 timescales. **Right:** Average  $\Delta f/f$  triggered on ILH calcium spikes shows a mean corresponding reduction  
438 in cH activity (n = 159 ILH spikes extracted from mean  $\Delta f/f$  traces from 14 fish across the entire duration  
439 of the experiment)  
440 **(c) Top:** Raster plots showing mean calcium activity from the mLH, ILH and cH of 14 fish before and after  
441 presentation of water and food cues. **Bottom:** Quantification of integrated (sum)  $\Delta f/f$  values and spike  
442 frequency (spikes/min) per fish across experimental epochs (300s baseline, 300s after water (W) delivery  
443 or 600 s after food delivery (F). Each colored line represents an individual fish. Water delivery was  
444 sufficient to significantly modulate both the cH ( $p = 6.1 \times 10^{-5}$  (integrated fluorescence)/0.0497 (spike freq.)  
445 and the ILH ( $p = 0.029/0.026$ ) but not the mLH ( $p = 0.48/0.055$ ). Note though from **(b)** that the mLH does  
446 transiently respond to water delivery. Food delivery significantly increased mLH integrated fluorescence  
447 ( $p = 1.2 \times 10^{-4}$ ) and spike frequency ( $p = 1.2 \times 10^{-4}$ ) relative to water delivery. Food delivery also significantly  
448 increased ILH integrated fluorescence ( $p = 0.045$ ) and spike frequency (0.0016) relative to water delivery.  
449 Food delivery significantly reduced cH integrated fluorescence further relative to water delivery ( $p$   
450  $= 3.1 \times 10^{-4}$ ), but not spike frequency ( $p = 0.52$ ). W = water, F = food. One-tail Wilcoxon Sign Rank Test.  
451 **(d)** Cross-correlogram of hypothalamic cell-sized voxels (cells and/or neuropil from downsampled image  
452 stacks, see Figure 2a) from 4 example fish. cH and LH voxels were mostly anti-correlated, whereas  
453 voxels within each cluster had correlated activity.  
454 **(e)** Correlation coefficients of other hypothalamic voxels relative to a voxel with the cH, mLH or ILH.  
455 **(f)** Summary of data from 14 fish, showing the probability of the  $n^{\text{th}}$  most anti-correlated voxel belonging to  
456 each of the other clusters.

457  
458 ***The activities of cH and LH neurons are differentially modulated by food sensory cues***  
459 ***and ingestion***

460 We next asked whether food sensory cues might have differential and independent effects from  
461 the consummatory cues elicited by the biting and swallowing of prey. Specifically, we tested the  
462 hypothesis that such ingestion cues might be necessary for the more sustained reciprocal  
463 changes in LH and cH activities that accompany voracious feeding. Since consummatory  
464 activity cannot be assessed in head-fixed animals, pERK analysis of activity was performed on  
465 post-fixed animals after free-swimming hunting and feeding behaviors. To distinguish between  
466 sensory and consummatory activities, we compared the neural activity of food-deprived fish  
467 upon exposure to either paramecia or artemia. Artemia are live prey commonly used to feed  
468 adult zebrafish, and are actively hunted by fish at all stages (Figure 4a, Video 2). They are  
469 however too large to be swallowed and consumed by larvae. Thus, the comparison between  
470 these two types of prey dissociates neural activity associated with prey detection and hunting  
471 from the neural consequences of food ingestion.

472           We found that with exposure to artemia it was not possible to detect a change in cH  
473 activity, but as observed above with live calcium imaging, exposure to this food cue in the  
474 absence of ingestion induced a small increase in ILH neural activity and a larger increase in  
475 mLH activity (Figure 4a-b). The artemia-induced hypothalamic activity was, however, less than  
476 that observed with consumable prey (Fig 4a-b). These observations suggest that the mLH  
477 responds primarily to sensory cues and/or induced hunting behavior whereas the induction of  
478 ILH activity largely depends on consumption. These data are furthermore consistent with the  
479 strong anti-correlation of cH with ILH activity (compared to mLH activity, Fig 3f), since both  
480 respond more strongly to food consumption rather than sensory cues. Thus, in addition to  
481 comprising distinct cell types (Figure 1- Figure Supplement 2), the ILH and mLH are also  
482 selective for different food cues, raising the possibility that they could be further specialized for  
483 distinct behavioral functions (Figure 4c, also see Discussion).

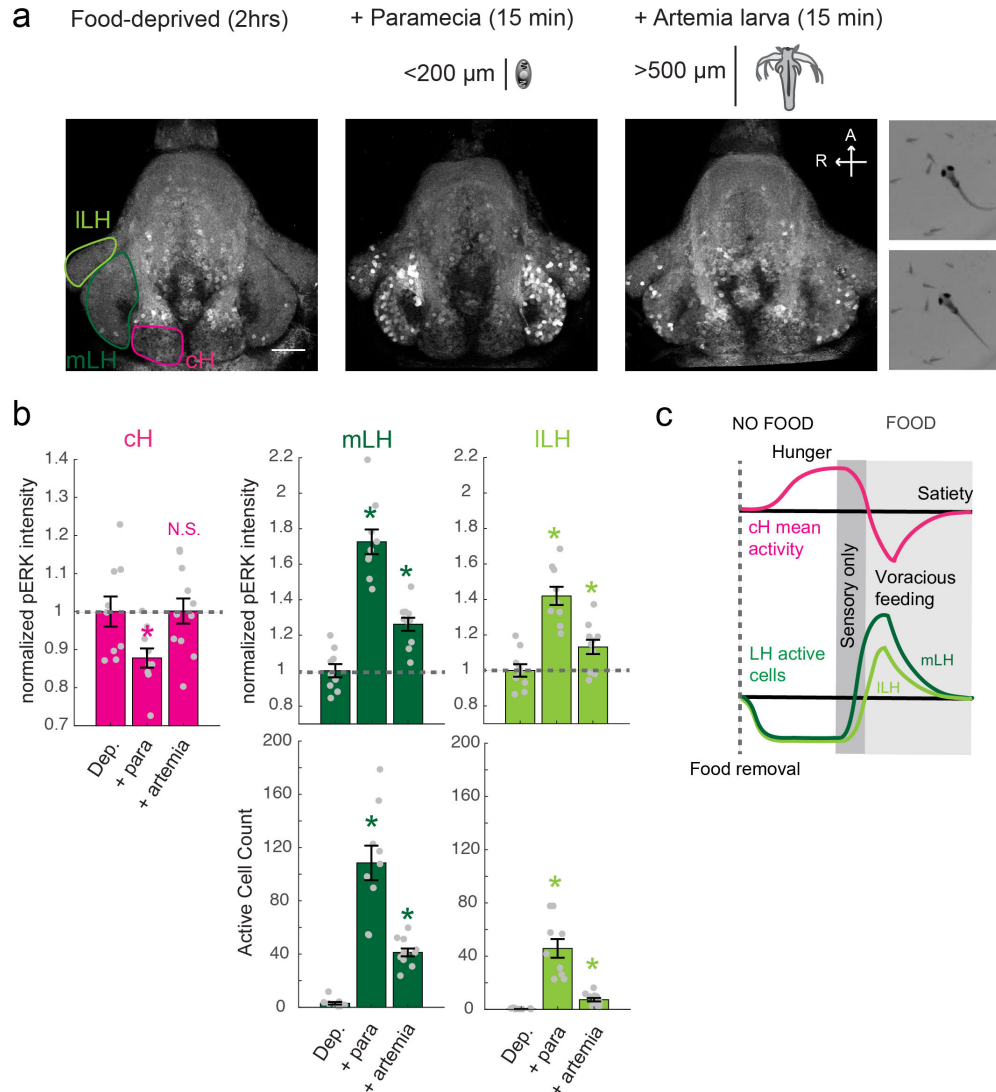

484

485 **Figure 4: Sensory cues and food consumption differentially regulates cH and LH domains**  
 486 **(a)** Representative images of pERK activity induced by parametia vs artemia larvae. Hatched artemia are  
 487 sensed and actively hunted by 7-8 dpf larval zebrafish, but too large to consume, allowing for the  
 488 dissociation of sensory cues/hunting behavior and food consumption. Scale bar = 50  $\mu\text{m}$ . Rightmost  
 489 panel: Larval zebrafish attempt to hunt live artemia, performing J-bends and pursuits with eyes converged  
 490 (Bianco et al., 2011). Also see Video 2.

491 **(b)** cH activity (normalized pERK intensity) is significantly reduced by parametia but not by artemia ( $p =$   
 492  $0.016$  (parametia),  $0.648$  (artemia)). In contrast, the LH can be activated by artemia alone, though more  
 493 strongly in the presence of parametia. The ILH is more weakly activated than the mLH by artemia. Both  
 494 normalized pERK intensity (mLH:  $p = 2.06 \times 10^{-5}$  (parametia),  $p = 4.87 \times 10^{-4}$  (artemia)); ILH:  $p = 2.06 \times 10^{-5}$   
 495 (parametia),  $p = 0.033$  (artemia)), and active cell count (mLH:  $p = 1.08 \times 10^{-5}$  (parametia),  $p = 6.02 \times 10^{-5}$   
 496 (artemia); ILH:  $p = 1.08 \times 10^{-5}$  (parametia),  $p = 5.04 \times 10^{-5}$  (artemia)) are shown, with  $n = 8/9/11$  fish, One-  
 497 tail Wilcoxon Rank Sum Test).

498 **(c)** Revised schematic showing differential activation of cH and LH domains in response to food sensory  
 499 vs consummatory cues.

500

501

502 ***Optogenetic cH activation suppresses ILH neural activity***

503 The anti-correlated activity of the caudal and lateral hypothalamus suggests they might  
504 participate in mutual inhibition. We hypothesized that, during food deprivation, rising cH activity  
505 (along with the absence of food cues) suppresses LH activity, whereas the arrival of food cues  
506 and initial consumption that induces strong LH activity reciprocally shuts down cH activity. The  
507 reduction in cH activity, in turn, would permit higher LH activity, which may underlie voracious  
508 feeding behavior. Conversely, increased cH activity would reduce LH activity and return it to  
509 satiety levels.

510 In order to test our model that activation of cH neurons is sufficient to suppress LH  
511 activity, we expressed a red-shifted Channelrhodopsin (*Tg(UAS:ReaChR-RFP)*) in cH neurons  
512 (Dunn et al., 2016; Lin et al., 2013) and visualized LH neuronal activity via calcium imaging  
513 using *Tg(HuC:GCaMP6s)*. Since expression of ReaChR by the *Tg(116A:Gal4)* driver line was  
514 weak, we used a different Gal4 line, *Tg(y333:Gal4)*, that labels a smaller fraction of serotonergic  
515 neurons in the cH ( $57.4 \pm 2.1\%$ ), but drives robust ReaChR expression (Figure 5 – Figure  
516 Supplement 1). In addition, the *Tg(UAS:GGaMP6s)* transgene was expressed in some animals,  
517 allowing us to monitor optogenetically-induced cH activity. In these animals, ReaChR  
518 stimulation (10-15 seconds, 633 nm laser illumination) and subsequent calcium imaging  
519 confirmed strong activation of the cH. Significantly, optogenetic stimulation of the cH reduced  
520 spontaneous ILH activity (Figure 5b, d), but did not alter mLH activity. Hence it appears that cH  
521 activity is sufficient to inhibit ILH but not mLH activity. This distinction may allow mLH neurons to  
522 remain sensitive and responsive to food cues under food-deprivation conditions, while cH  
523 activity is elevated.

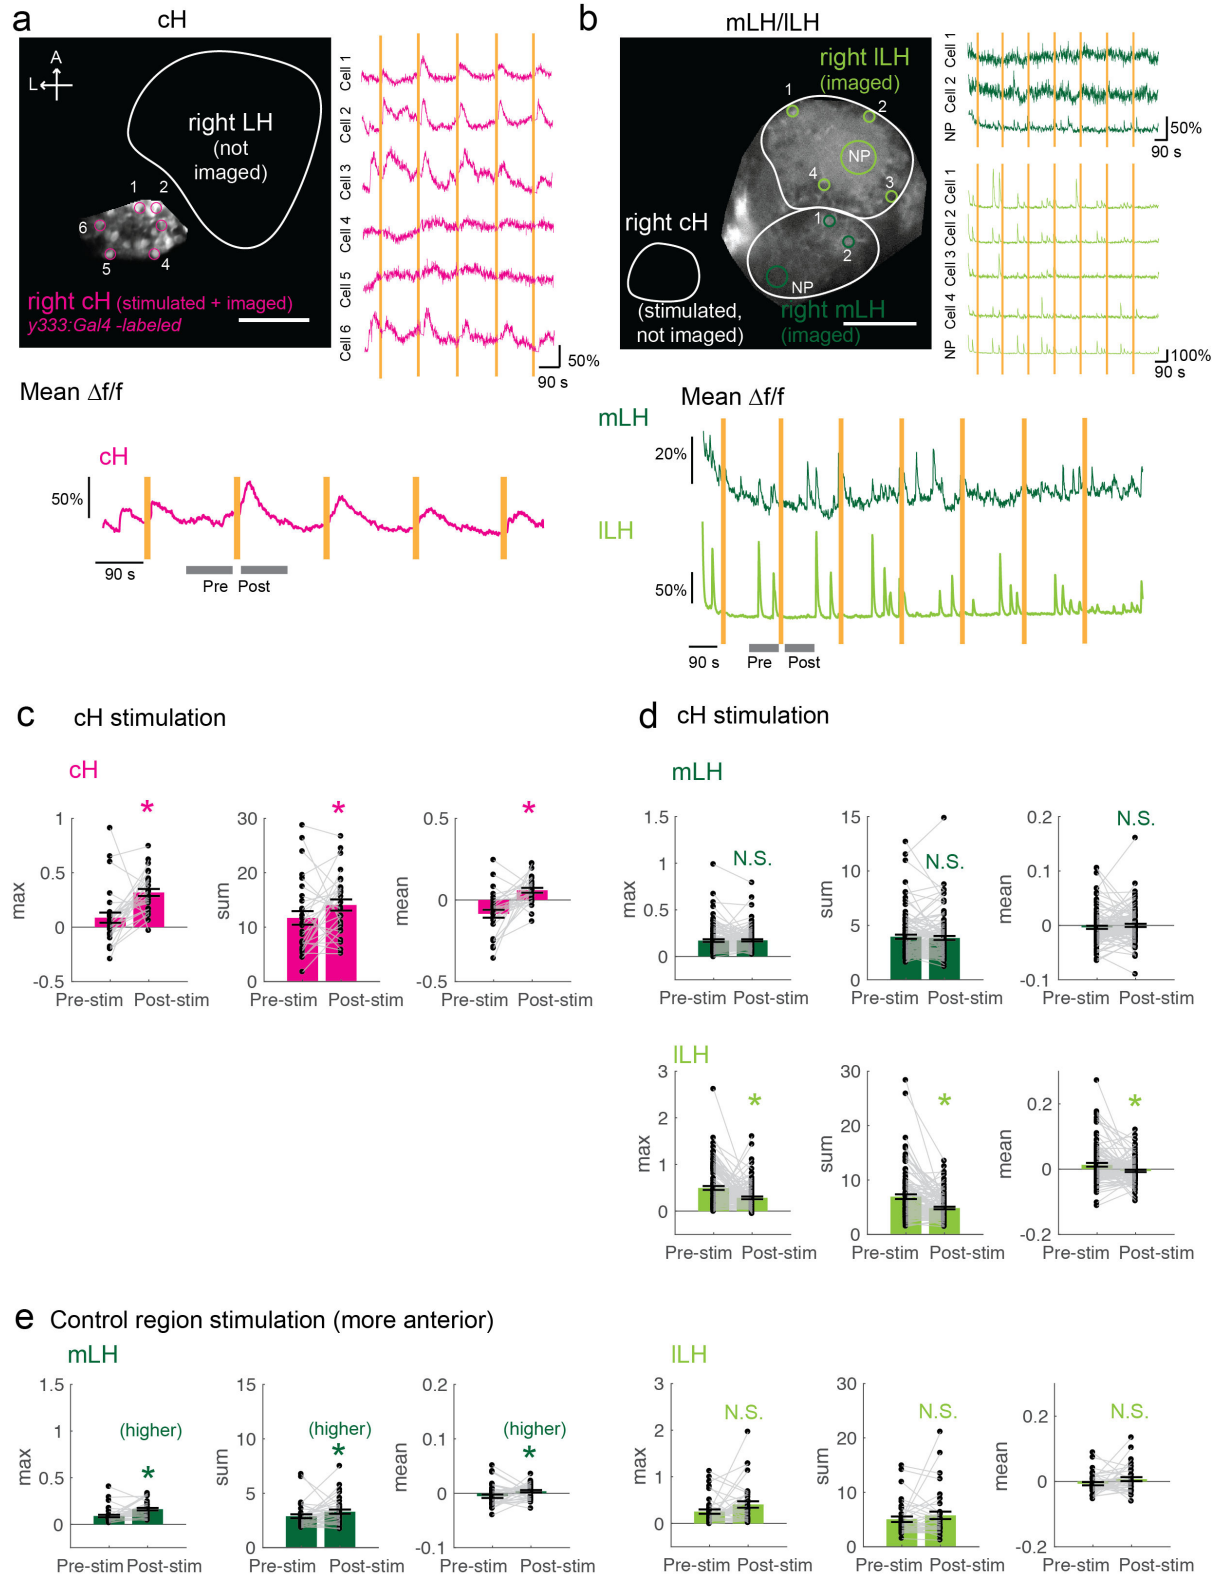

524  
525  
526  
527  
528

**Figure 5 with 1 supplement: Optogenetic cH stimulation is sufficient to reduce ILH activity**  
(a) Stimulation of cH neurons in *Tg(y333:Gal4;UAS:ReaChR-RFP;UAS:GCaMP6s)* fish with a 633 nm laser induces sustained activation in a fraction of cells. Image shows confocal imaging and stimulation

529 area, numbers depict individual cells whose activities ( $\Delta f/f$ ) are shown on the right. Scale bar = 50  $\mu\text{m}$ .  
530 Bottom: Mean  $\Delta f/f$  across the entire ROI over time. Orange bars = 10 second stimulation period (no  
531 imaging occurs during that period). Gray bars indicate pre- and post-stimulation period over which activity  
532 will be averaged.

533 **(b)** Stimulation of cH neurons in a different fish expressing *Tg(y333:Gal4;UAS:ReaChR-RFP;*  
534 *HuC:GCaMP6s)* reduces spontaneous activity in ILH neurons. The cH was not imaged simultaneously as  
535 ReaChR can be activated by higher-intensity 488 nm light (see methods). Image shows confocal imaging  
536 and stimulation area, numbers depict individual cells or neuropil (NP) whose activities ( $\Delta f/f$ ) are shown on  
537 the right. It was not always possible to resolve individual LH cells in other imaged fish. Scale bar = 50  $\mu\text{m}$ .  
538 Bottom: Mean  $\Delta f/f$  across mLH and ILH ROIs over time.

539 **(c-e)** Comparison of mean and maximum  $\Delta f/f$  for a 90 s window before and after ReaChR stimulation.  
540 Each data point represents a single stimulation.

541 **(c)** cH activity increases after ReaChR stimulation.  $N = 29$  stimulations across 8 fish,  $p =$   
542  $0.0002(\text{max})/0.036(\text{sum})/9.2 \times 10^{-5}(\text{mean})$ , One-tail Wilcoxon sign rank test.

543 **(d)** mLH activity does not change after ReaChR stimulation ( $p = 0.74$  (max)/0.85 (sum)/0.13 (mean)),  
544 whereas ILH activity is significantly suppressed after ReaChR stimulation ( $p = 0.0003(\text{max})/1.8 \times 10^{-6}$   
545 (sum)/0.049(mean)).  $N = 108$  stimulations across 9 fish. Two-tail Wilcoxon sign rank test.

546 **(e)** Stimulation of a control area (i.e. more anterior to cH and unlabeled by ReaChR) tends to increase  
547 activity in the mLH ( $p = 0.0003(\text{max})/0.039(\text{sum})/0.039(\text{mean})$ ) and does not change ILH activity ( $p =$   
548  $0.099(\text{max})/0.65(\text{sum})/0.096(\text{mean})$ ).  $N = 37$  stimulations from 5 fish. Two-tail Wilcoxon sign rank test.  
549

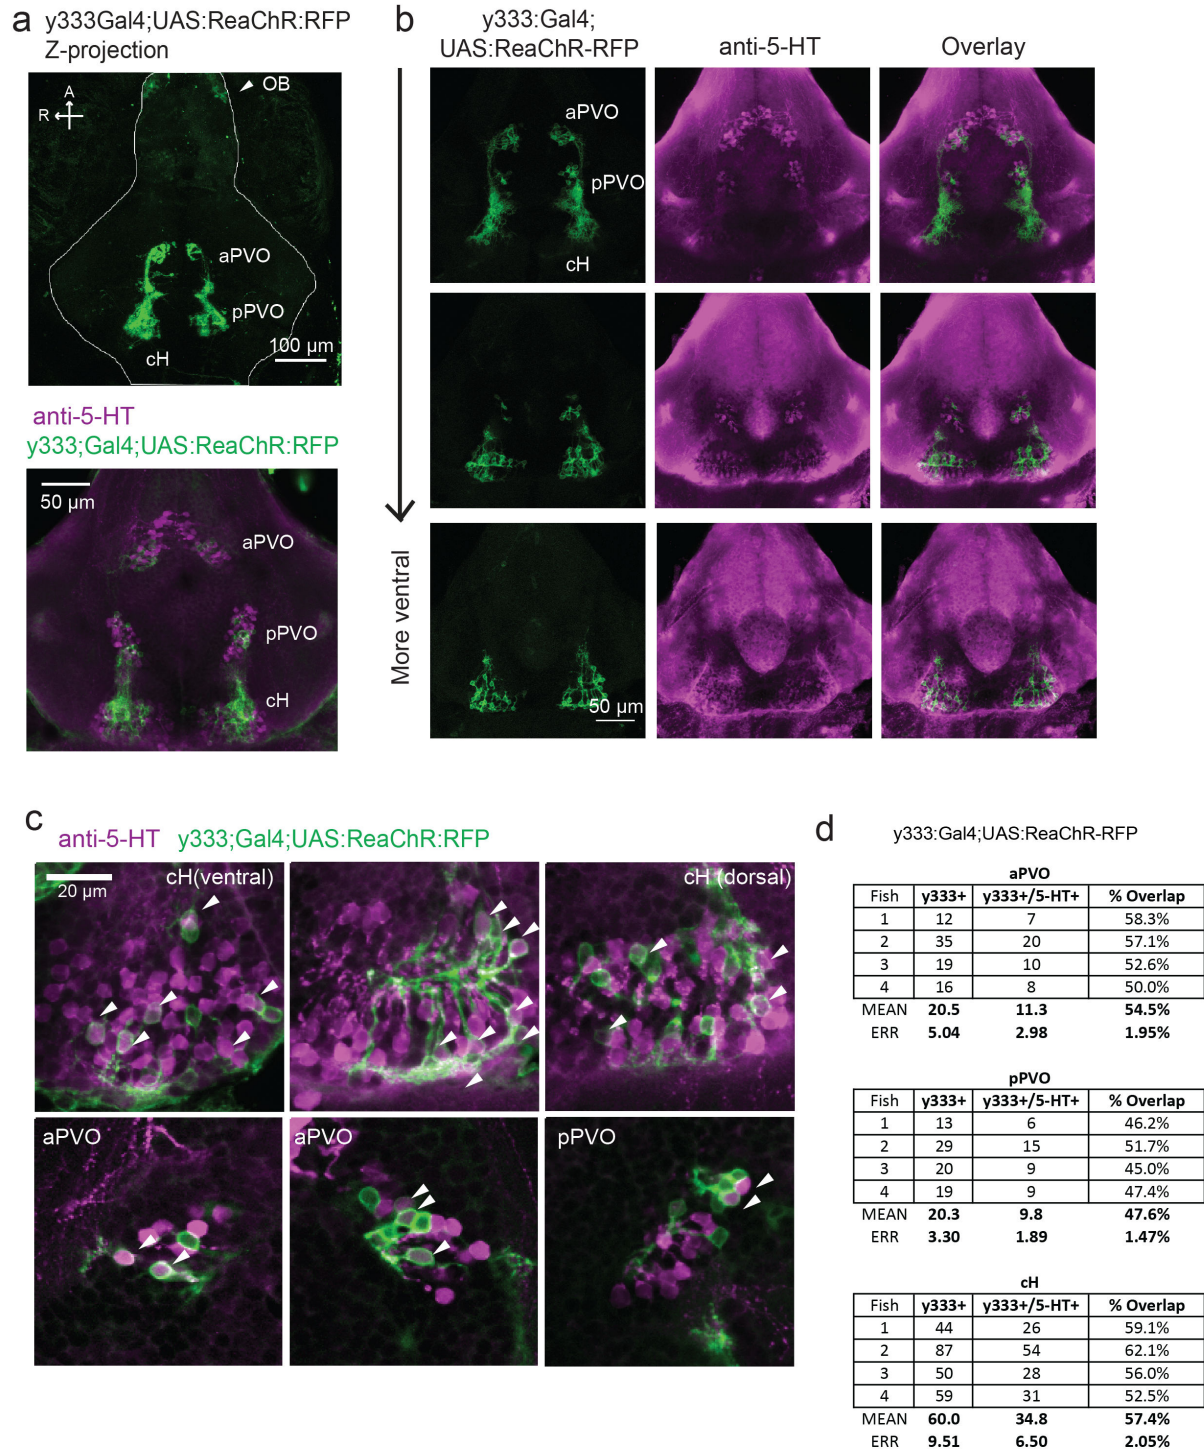

550  
551  
552  
553  
554  
555  
556

**Figure 5- Figure Supplement 1: Characterization of the *y333:Gal4* line**

(a) We used an alternative cH-labeling Gal4 line, *Tg(y333:Gal4)* (Marquat et al (2015)), to drive *Tg(UAS:ReaChR-RFP)* expression, as we were unable to detect any ReaChR expression using *Tg(116A:Gal4)*. Top: Whole mount stack of a *Tg(y333:Gal4;UAS:ReaChR-RFP)* (green) shows relatively specific expression in the caudal hypothalamus, as well as some labeling in the olfactory bulb (white arrow) and other scattered cells. Scale bar = 100 μm. Bottom: Z-projection image of a dissected fish

557 brain mounted ventral side up, with anti-5-HT staining shown in magenta. Scale bar = 50  $\mu$ m.  
558 **(b)** Overlap of *Tg(y333:Gal4;UAS:ReaChR-RFP)* (green) with anti-5-HT immunostaining (magenta) is  
559 seen in all layers of the caudal hypothalamus, and also the paraventricular organ (PVO), though the  
560 degree of overlap is less for the PVO. Each row shows a different Z-plane, moving from more dorsal to  
561 more ventral. Dissected fish brains mounted ventral side up. Scale bar = 50  $\mu$ m.  
562 **(c)** Higher magnification image showing moderate overlap of *Tg(y333:Gal4;UAS:ReaChR-RFP)* with anti-  
563 5-HT staining in the cH and PVO. Arrows indicate cells with overlapping RFP and 5-HT expression. Scale  
564 bar = 20  $\mu$ m.  
565 **(d)** Quantification of overlap between 5-HT and *Tg(y333Gal4;UAS:ReaChR-RFP)* expression in the cH  
566 and PVO.

567

### 568 ***Functional dissection of cH serotonergic neurons in feeding behavior***

569 The opposing patterns of cH and LH activities suggest that they might have opposing roles in  
570 the control of hunting and feeding behavior. Given that the cH is composed of neuromodulatory  
571 populations, including serotonergic neurons, and is sufficient to suppress ILH neural activity, we  
572 reasoned that these cH neurons might act as a homeostatic regulator of satiation state-  
573 dependent food intake. In particular, we postulated that: 1) higher cH activation prior to feeding  
574 would encode a state of hunger and enhance the animal's sensitivity to subsequent food cues,  
575 and 2) higher cH activation during feeding would oppose ILH activity to suppress food intake. To  
576 test this hypothesis, we combined ReaChR activation of cH neurons with quantitative  
577 measurements of food intake, again using the *y333:Gal4* transgenic line. When satiated  
578 (continuously fed) fish were exposed to whole field orange (630 nm) light for 10 minutes prior to  
579 food presentation, fish in which ReaChR was expressed in the cH consumed significantly more  
580 paramecia than fish that lacked *Tg(y333:Gal4;UAS:ReaChR-RFP)* expression (Figure 6a). This  
581 effect was not observed for food-deprived fish, perhaps because they already display high cH  
582 activity and a high rate of feeding (Figure 6a). These observations are consistent with the  
583 interpretation that optogenetic cH activation simulated a food-deprived state in satiated fish and  
584 thus enhanced their subsequent feeding.

585 In contrast to the outcome of optogenetic activation prior to feeding, the induction of cH  
586 activity during food presentation reduced feeding, especially in food-deprived fish (Figure 6b).

587 These observations indicate that optogenetic cH activation can reduce feeding, particularly in



588 animals in which cH activity is low (Figure 6b, Figure 6 - Figure Supplement 1). Accordingly, we  
589 propose that optogenetic stimulation of cH activity inhibits ILH activity and thereby causes the  
590 feeding rate to decrease.

591 Finally, we asked what would happen if we directly reduced net cH activity via partial  
592 ablation of the serotonergic population. We hypothesized that this would induce a constitutively  
593 low cH activity, which should enhance food intake regardless of satiation state. Thus, we  
594 performed chemical-genetic ablations of serotonergic cH neurons labeled by *Tg(116A:Gal4;*  
595 *UAS:nfsb-Cherry)* (Curado et al., 2008), and compared the feeding rates of ablated animals to  
596 that of sibling controls (Figure 6c). Food ingestion was examined in animals in which cH  
597 neurons were partially ablated (see Figure 6 - Figure Supplement 2 and legend for details) and  
598 compared to that of their non-ablated siblings, who lacked *Tg(116A:Gal4;UAS:nfsb-Cherry)*  
599 expression (Figure 6c). We observed a significantly increased food intake for ablated fish in  
600 both food-deprived and fed conditions, indicating that regardless of prior activity patterns, low  
601 cH activity in the presence of food is what ultimately controls food consumption.

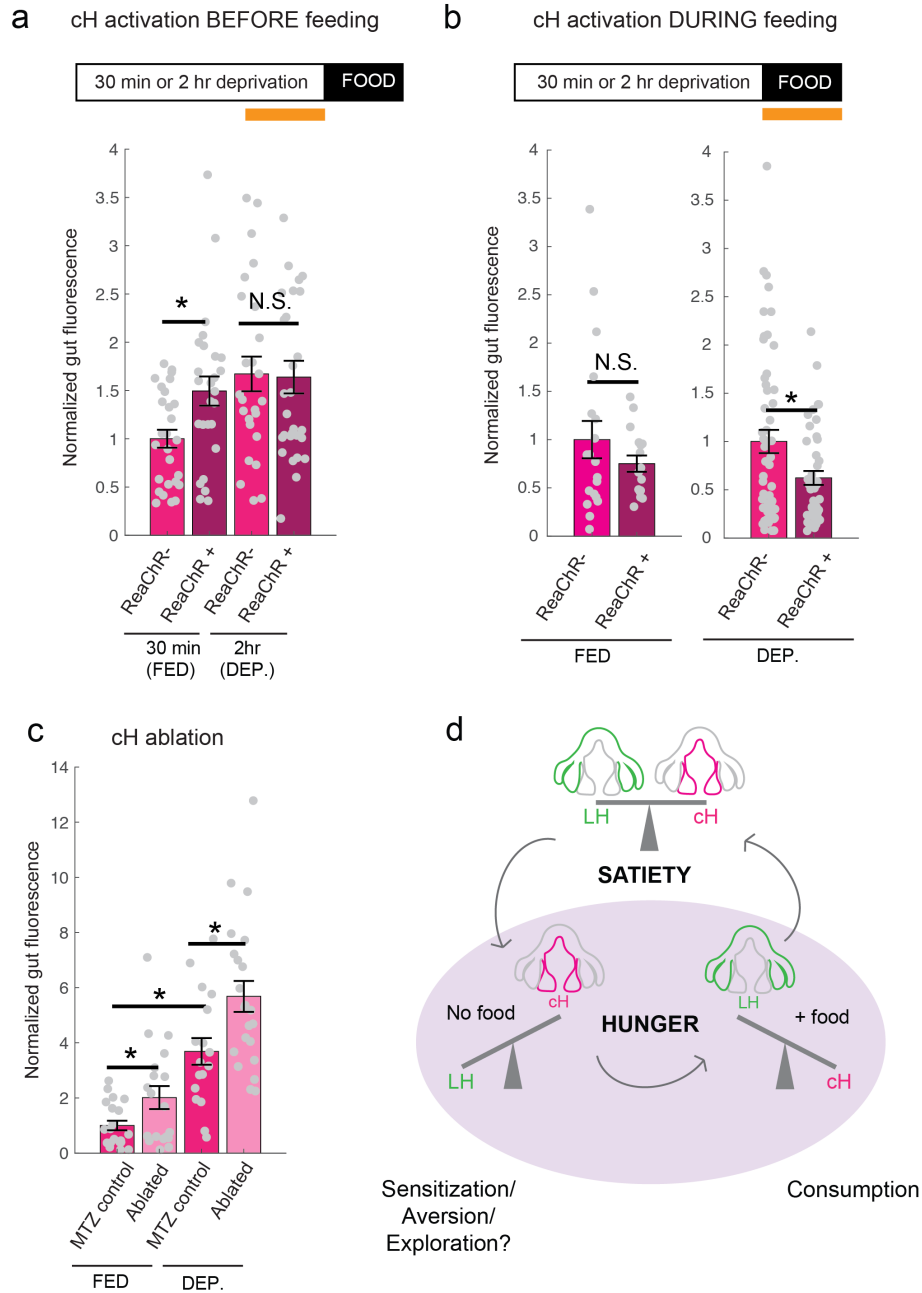

602

603 **Figure 6 with 3 supplements: Role of the cH in behavioral control**

604 **(a)** Optogenetic activation (orange bar in schematic) of the cH 10 min prior to feeding increases food  
 605 intake in fed fish (i.e. 30 min food-deprived), but not food-deprived (2hr food-deprived) fish, during  
 606 subsequent food presentation. Fed:  $n = 27/26$  (ReaChR-/ReaChR+),  $p = 0.005$ . Food-deprived:  $n = 25/29$   
 607 (ReaChR-/ReaChR+),  $p = 0.36$ , One-tail Wilcoxon Rank Sum Test. Since ReaChR expression via  
 608 116A:Gal4 was negligible, we used another Gal4 (*Tg(y333:Gal4)*) line that is also specific to the cH when  
 609 ReaChR is expressed. Fed and food-deprived fish were assayed simultaneously, thus all results was  
 610 normalized to fed controls. ReaChR- controls do not have visible *Tg(y333:Gal4;UAS:ReaChR-RFP)*  
 611 expression, and thus are a mixture of siblings expressing *Tg(y333:Gal4)* only, *Tg(UAS:ReaChR-RFP)* or  
 612 neither of these transgenes, each with  $\frac{1}{3}$  probability.

613 **(b)** Left: Optogenetic activation of the cH (orange bar in schematic) during feeding in fed fish does not

614 significantly reduce food intake.  $n = 19/16$  (ReaChR-/ReaChR+),  $p = 0.44$  (N.S.), Right: Optogenetic  
615 activation of the cH during feeding in food-deprived fish reduces food intake.  $n = 53/44$  (ReaChR-  
616 /ReaChR+),  $p = 0.042$ . Since fed and food-deprived fish were assayed in different experiments, gut  
617 fluorescence normalized to their respective controls, One-tail Wilcoxon Rank Sum Test.  
618 (c) Nitroreductase-mediated ablation of the cH in (*Tg(116A:Gal4;UAS:nfsb:mCherry)* or negative fish  
619 treated with metronidazole from 5-7 dpf significantly enhances food intake in 8 dpf fish.  $p =$   
620  $0.004/0.04/1.4 \times 10^{-5}$  (fed control vs ablated, dep. control vs ablated, fed vs dep.). Controls do not have  
621 visible *Tg(116A:Gal4;UAS:nfsb-mcherry)* expression, and thus are a mixture of siblings expressing  
622 *Tg(116A:Gal4)* only, *Tg(UAS:nfsb-mcherry)* or neither of these transgenes, each with  $\frac{1}{8}$  probability.  
623 (d) Schematic summarizing our results. We propose distinct roles of the cH during hunger, depending on  
624 the presence or absence of food. See Supplementary File 1 – Conceptual Circuit Model for elaboration.  
625

a Whole-field optogenetic illumination

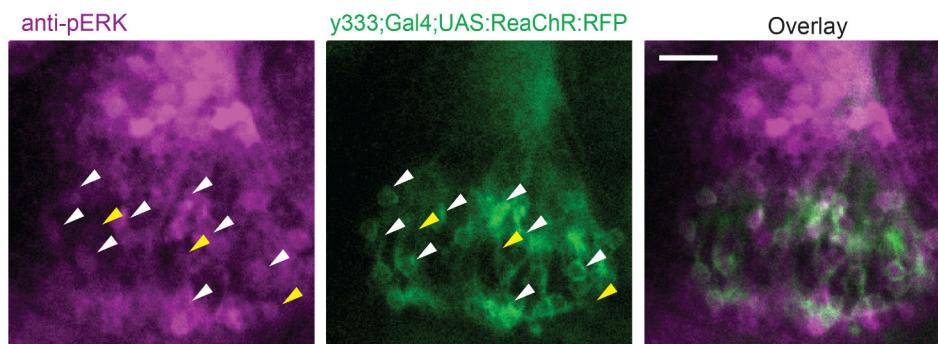

626  
627  
628  
629  
630  
631  
632  
633  
634  
635

**Figure 6 – Figure Supplement 1: ReaChR activation by whole-field optogenetic illumination**

(a) *Tg(y333:Gal4;UAS:ReaChR-RFP)* stimulation during feeding is sufficient to induce pERK activity in many transgene-positive neurons. White arrows point to a few examples where *Tg(y333:Gal4;ReaChR-RFP)* expression corresponds to more intense pERK staining. Yellow arrows point to examples in which ReaChR expression is visibly absent, which appears to correspond to weaker pERK staining. ReaChR expression looks hazy as it was photobleached by the end of the 10 min stimulation period. Scale bar = 20  $\mu\text{m}$ .

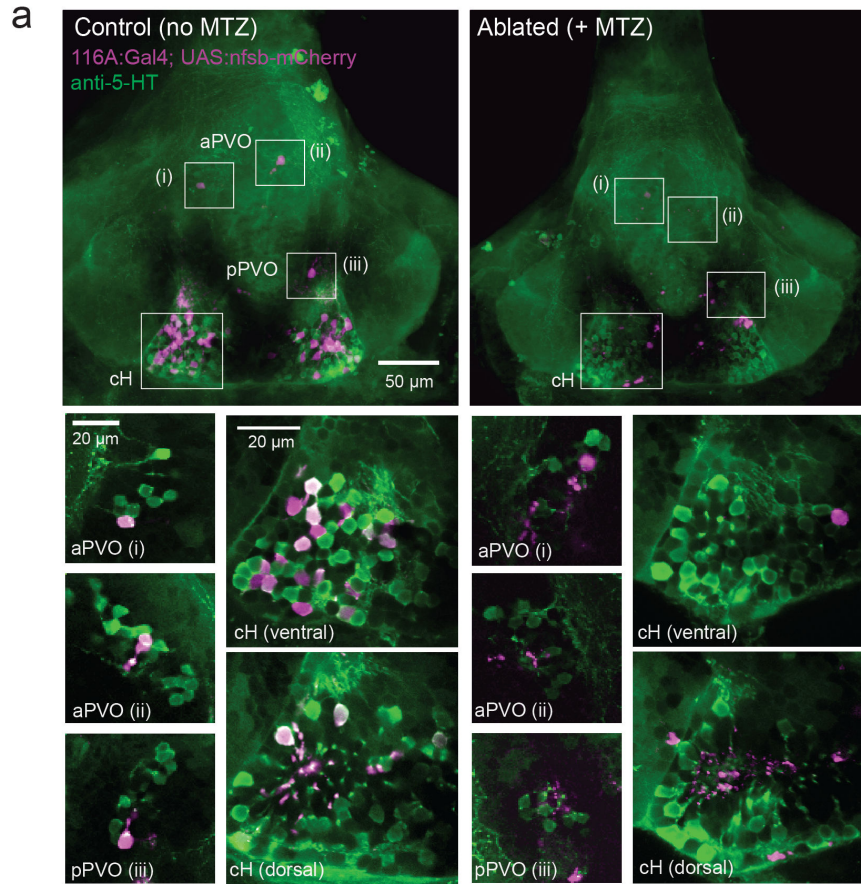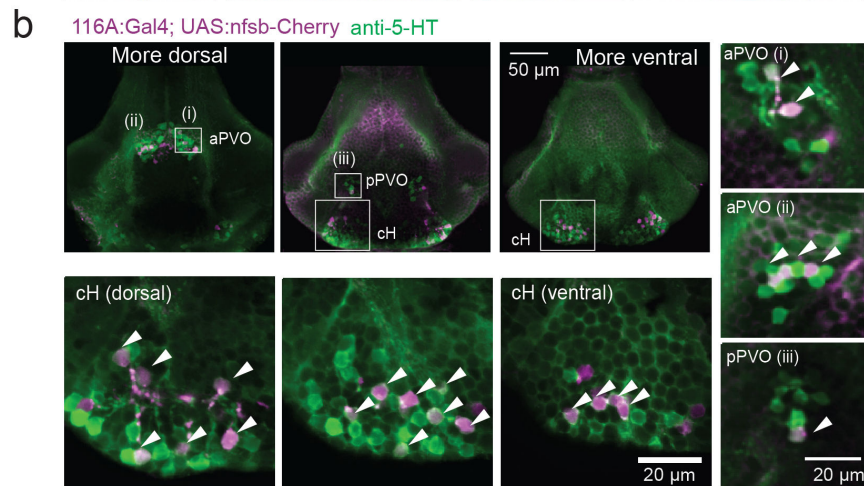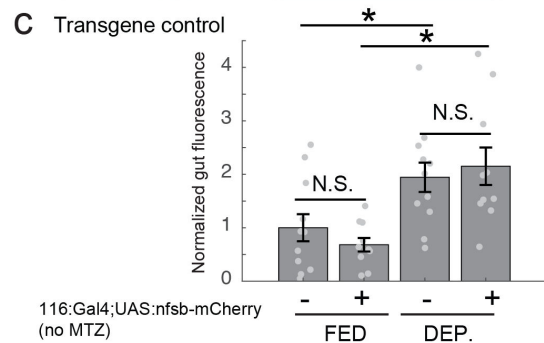

637 **Figure 6 - Figure Supplement 2: Nitroreductase-mediated ablation of cH neurons**  
 638 (a) Effective ablation of *Tg(116A:Gal4;UAS:nfsb-mCherry)*-labeled neurons using MTZ. Note that due to  
 639 sparser expression, ablation of the cH/PVO populations are likely to be partial (<50%). Representative  
 640 projection images are shown of non-ablated (left) and ablated fish brains (right). Scale bar = 50  $\mu$ m.  
 641 Insets roughly labeled by white boxes show higher-magnification single-plane images of cH, aPVO and  
 642 pPVO labeling by this transgene, and overlap with 5-HT expression. Overall, since the labeling of cH  
 643 neurons with nitroreductase-mCherry is relatively weak (~ 6-8 cells in the aPVO, ~2-4 cells in pPVO, and  
 644 ~30-40 cells in the cH), our ablations are only partial and may include a few PVO neurons. Scale bar = 20  
 645  $\mu$ m.  
 646 (b) Similar to *Tg(116A:Gal4;UAS:GFP)*, there is high overlap of *Tg(116A:Gal4;UAS:nfsb-mCherry)* with  
 647 anti-5-HT immunostaining. Scale bar = 50  $\mu$ m. Insets roughly labeled by white boxes show higher-  
 648 magnification single-plane images of cH, aPVO and pPVO labeling by this transgene, and overlap with 5-  
 649 HT expression. Scale bar = 20  $\mu$ m.  
 650 (c) The *Tg(116A:Gal4;UAS:nfsb-mCherry)* transgene does not affect feeding in the absence of MTZ,  
 651 relative to non-expressing siblings. Fed:  $p = 0.64$ ,  $n = 11$ (negative)/10(positive); Dep.:  $p = 0.91$ ,  $n =$   
 652 11(negative)/10(positive), Fed vs Dep.:  $p = 0.035$  (negative)/ $7.7 \times 10^{-4}$  (positive).  
 653

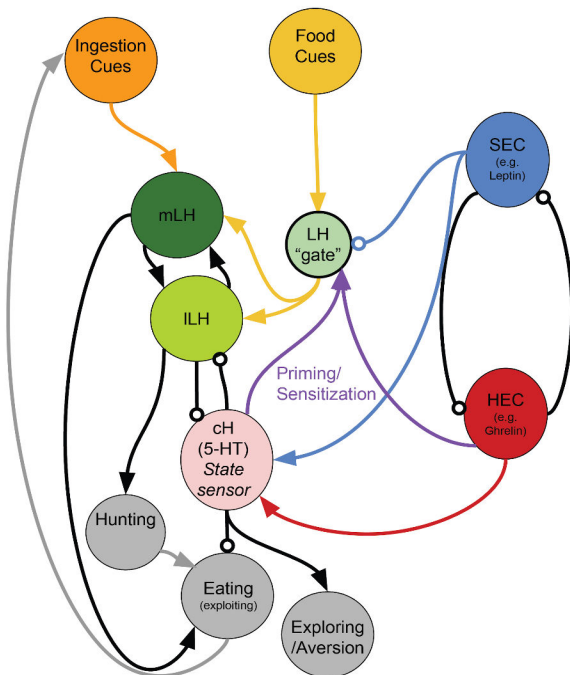

654 **Figure 6 - Figure Supplement 3: A conceptual circuit model of the cH/LH hypothalamic network**  
 655 HEC = Hunger Encoding Circuit, SEC = Satiety Encoding Circuit, which should have anti-correlated  
 656 activities and report the animal's energy/caloric status. The cH represents both hunger and satiety state  
 657 and sensitizes (or primes) the LH during hunger. It may drive other behaviors such as exploration or  
 658 aversive behavior, but also suppresses feeding. Other HEC components may also be involved in LH  
 659 sensitization. We propose mutual inhibition between the cH and LH, though we have only demonstrated  
 660 unidirectional inhibition (cH on ILH) thus far. The mLH, normally responsive to food cues, may promote  
 661 hunting, though not necessarily coupled with ingestion, whereas the ILH, which is more responsive to  
 662 ingestive cues, should enhance further ingestion (i.e. eating). The LH "gate" is a conceptual  
 663 representation of how its sensitivity to food cues could be modulated by other signals (i.e. reduced by the  
 664 SEC and enhanced by cH-mediated sensitization). It does not necessarily represent a physical neuronal  
 665 population. More elaboration can be found in Supplementary File 1 – Conceptual Circuit Model.  
 666  
 667

## 668 **DISCUSSION**

669 Decades-old studies on appetite regulation in mammals have suggested modular hypothalamic  
670 units that work to suppress or enhance food intake respectively. Here, we show that the larval  
671 zebrafish hypothalamic network can similarly be functionally divided into its medial and lateral  
672 units. These units show anti-correlated activity patterns during various states that relate to  
673 ingestive behavior, such as hunger and voracious eating, and energy homeostasis is reflected  
674 by a restoration of balance between these areas (Figure 6d). Furthermore, we show that within  
675 these broad neural response classes lies a diversity of neurons that encode specific stimuli and  
676 perform distinct functions depending on the timing of activation.

677

### 678 *Mutually opposing hypothalamic networks control zebrafish appetite*

679 We show that the medial hypothalamic zone, especially the caudal hypothalamus (cH) in the  
680 zebrafish, is strongly activated by food-deprivation, and strongly inhibited during voracious  
681 feeding, and that this happens on a timescale of seconds to minutes. Here, we focused mainly  
682 on the serotonergic cH neurons, although many medially localized neurons may show similar  
683 activity patterns. In contrast, the lateral hypothalamus (LH), which contains GABAergic and  
684 glutamatergic neurons, is inhibited in the absence of food and most strongly activated during  
685 voracious eating. Interestingly, satiated fish exhibit intermediate activity levels in both  
686 hypothalamic regions. Thus, hunger in the presence and absence of food is represented by two  
687 distinct states of activity in opposing brain regions, with restoration of energy homeostasis  
688 paralleled by a balance of the network.

689 While generally anti-correlated, the cH and LH also appear to be differentially modulated  
690 by both internal (i.e. hunger cues) and external factors (i.e. food). In the absence of food, LH  
691 cellular activity decreases rapidly, suggesting a requirement of food/other external cues to drive  
692 LH activity, though some modest rate of spontaneous activity is still observed. On the other  
693 hand, the slower timescales of cH activation appears to reflect the animal's rising caloric deficit.

694 Notably, many of the cH neurons are cerebrospinal fluid-contacting and thus have access to  
695 circulatory information (Lillesaar, 2011; Pérez et al., 2013).

696 Further, despite clear reductions in pERK cellular activity, calcium imaging has revealed  
697 more complex dynamics of the LH over food-deprivation. These changes could be induced by  
698 the generally aversive and potentially unnatural internal state of a head-fixed preparation, or,  
699 more intriguingly, could reflect an increased sensitivity of LH neurons over the course of hunger.  
700 These hypotheses can potentially be distinguished in future work by performing calcium imaging  
701 of hunting and feeding behavior in a free-swimming setting (Kim et al., 2017).

702 Once food becomes available (but when caloric deficit is still high), a state change  
703 occurs, and LH activity is strongly enhanced whereas cH activity is strongly suppressed.  
704 Importantly, the degree of cH suppression and LH activation are correlated with the extent of  
705 prior food-deprivation, suggesting a role for these nuclei in regulating food intake based on  
706 caloric needs. This striking anti-correlation between the cH and LH suggests a mutual inhibition,  
707 and that an acute reduction in cH activity is what allows for the enhanced LH release.

708 We have partially confirmed the hypothesis of such mutual inhibition using optogenetic  
709 stimulation of the cH and simultaneous calcium imaging of the LH. We show that activation of  
710 the cH is sufficient to drive down ILH, but not mLH activity. Consistent with these results, the cH  
711 appears to be more strongly anti-correlated with the ILH than the mLH.

712 However, the mechanisms by which cH might influence LH activity, and vice versa, are  
713 still unknown. It is possible that the cH may act via inhibitory GABAergic neurons, and/or exert  
714 their effects through direct secretion of monoamines into the ventricles or perineuronal space.  
715 The effect of cH optogenetic activation on ILH activity appears to persist for minutes, allowing  
716 for the possibility of direct neuromodulatory action. At the same time, there appears to be a fast  
717 (seconds) anti-correlation between cH and LH calcium activity, suggesting faster inhibitory  
718 connections. The LH, which was previously characterized in Muto et. al (2017), similarly does  
719 not appear to send direct projections to the cH, but could potentially interact via intermediary

720 neurons in the medial/periventricular regions of the hypothalamus.

721

722 *Food cues differentially regulate cH and LH domains*

723           Ingestive behavior has been proposed to comprise a number of temporal stages: 1) the  
724 initiation phase, triggered by energy deficit, in which the animal begins to forage; 2) the  
725 procurement phases, triggered by the presence of food sensory cues, in which the animal seeks  
726 and pursues food; and 3) the consummatory phase, which involves a more stereotyped motor  
727 program (Berthoud, 2002; Watts, 2000). An animal's energy status is sensed internally and may  
728 influence the initiation, procurement and consummatory stages of ingestive behavior. Thus, a  
729 hungry animal will be more alert to food cues, seek food more persistently and also eat it more  
730 voraciously.

731           In mammals, LH neurons are responsive to both external food sensory cues and  
732 consummatory cues (Jennings et al., 2015). Here, we show that the LH lobes in zebrafish also  
733 respond differentially to food cues in an anatomically segregated manner. In this "sensory"  
734 stage, the mLH is already activated, which may reflect an enhanced sensitivity to food cues  
735 during hunger. However, mLH activation during this sensory stage is not as strong as post-food  
736 consumption. In contrast, the ILH is only weakly activated by food cues, and cH activity  
737 transiently falls but remains overall high. Thus, taken together with our optogenetic and calcium  
738 imaging data, the mutually inhibitory circuit model is most consistent between the cH and ILH  
739 (though the mLH is still generally anti-correlation with cH activity, especially in the presence of  
740 food).

741           Since ILH and cH activity are modulated within minutes of food consumption they are  
742 unlikely to reflect satiety signals, and rather might play a role in further driving voracious food  
743 consumption, at least until the activity of both populations returns to baseline. In contrast, the  
744 mLH may play a role in enhancing the sensitivity of the animal to external food sensory cues,  
745 even prior to initial food consumption.



746 It is unclear which consummatory cues modulate LH and cH activity. Based on live  
747 imaging results from Muto et al (2017), the greatest enhancement of LH activity was observed  
748 almost immediately (milliseconds to seconds) after paramecia consumption. Thus, the cue is  
749 likely a fast pregastric signal (taste/tactile/swallowing), rather than postgastric absorption or  
750 hormone secretion.

751

### 752 Functional roles of the cH and LH in and beyond appetite control

753 Finally, we test the hypothesis that the cH and LH form mutually antagonistic functional units  
754 that dominate different phases of hunger and drive appropriate behavioral responses during  
755 each phase. In particular, we show that the activation state of the cH is a crucial regulator of  
756 satiation-state dependent food intake. Artificial cH activation in satiated fish *prior* to feeding is  
757 sufficient to drive subsequent voracious feeding. Based on observed cH dynamics, we propose  
758 that the degree on cH inhibition during voracious feeding is proportional to the degree of cH  
759 activation prior to feeding. This could be mediated by the release of serotonin/other  
760 neuromodulators over the course of food-deprivation, which may be capable of sensitizing the  
761 LH even in the absence of food cues. An intriguing, though untested hypothesis is that the rise  
762 in LH calcium fluorescence during food-deprivation, that tends to parallel that of cH activity, may  
763 reflect such sensitization. In this way, zebrafish are able to retain a “memory” of their hunger  
764 state, which is released once food is presented, and up-regulate their feeding behavior  
765 accordingly. This motif might help ensure that the animal eventually returns to a stable  
766 equilibrium, that is, satiety.

767 We furthermore show that the acute effect of cH activation *during* feeding is suppression  
768 of food intake, whereas cH ablation enhances food intake, which is again consistent with  
769 mammalian studies of medial hypothalamic areas. At first glance, the observation that the cH  
770 acutely suppresses food intake is inconsistent with the idea that it is most active during hunger.  
771 However, our optogenetic experiments show that the context of cH activation needs to be taken

772 into consideration, and can have opposing results on feeding. In the presence of food, activation  
773 of the cH may simply drive down LH activity, hence reducing food intake. This is assuming that  
774 any sensitizing effect of cH activation is weaker than the acute inhibitory effect of cH activation  
775 on ILH activity, a conclusion that appears to be validated by our behavioral results.

776         The seemingly paradoxical roles of the cH during hunger may also make sense when  
777 considering that, in the absence of food, consummatory behavior would in fact be  
778 counterproductive. Thus, during food-deprivation, the cH may play complementary roles such as  
779 the sensitization of the LH and/or other feeding-related circuits (as discussed above), or drive  
780 alternative behavioral programs, like foraging or energy-conserving measures during this stage  
781 of hunger (see Supplementary File 1 - Conceptual Circuit Model for a more in-depth discussion).  
782 Given that cH neurons appear also to be activated by aversive stimuli (Randlett et al., 2015), it  
783 may also more generally encode a negative valence state in the absence of food. Similar  
784 features of hunger-related (i.e. AgRP) neurons have also been described in mammals (Betley et  
785 al., 2015; Chen et al., 2015; Dietrich et al., 2015; Mandelblat-Cerf et al., 2015).

786         Although the cH does not have an exact mammalian homolog, its functions have been  
787 proposed to be adopted by other modulatory populations, such as the serotonergic raphe  
788 nucleus in mammals (Gaspar and Lillesaar, 2012; Lillesaar, 2011). While known to be a potent  
789 appetite suppressant, serotonin is also released during food deprivation, and has been shown to  
790 enhance food-seeking behavior (Elipot et al., 2013; Katak et al., 1978; Pollock and Rowland,  
791 1981; Voigt and Fink, 2015). Thus, our results showing opposing cH activity patterns during  
792 hunger could reflect similarly complex roles of serotonin in zebrafish, potentially explaining  
793 some of its paradoxical functions. The cH and PVO also express dopaminergic (intermingled  
794 with 5-HT) and histaminergic neurons (in the surrounding cell-layer of the cH), which appear to  
795 be densely interconnected (Kaslin and Panula, 2001). We note that our data, while confirming a  
796 role of serotonergic neurons, does not rule out an involvement of these other neuromodulators  
797 in appetite control.

798 Further, our results do not rule out the involvement of other circuits in appetite control; in  
799 fact, they suggest that there are numerous players involved. For example, the PVO appears to  
800 be modulated by food cues and food-deprivation, is anti-correlated with LH activity, and labeled  
801 by our transgenic lines (albeit more sparsely), suggesting it may complement the role of the CH.  
802 Our conclusions are also limited by available tools and methodologies -- since different  
803 transgenic lines were utilized for stimulation and ablation, we cannot be certain that we are  
804 manipulating the same population of neurons, though both share mutual overlap with  
805 serotonergic cells. Also, due to the lack of complete transgene specificity, there is a possibility  
806 that our manipulations may affect non-specific targets such as the olfactory bulb.

807 Similarly, while the strong LH activation after food-deprivation suggests that it might  
808 promote voracious feeding, we were unable to assay the effect of LH activation in larval  
809 zebrafish, due to broad and unspecific expression within the LH-labeling transgenic line.  
810 However, Muto et al (2017) recently demonstrated that inhibition of the LH impairs prey capture  
811 behavior, though they did not implicate the LH in the regulation of food intake based on hunger  
812 state. Furthermore, electrical stimulation of the homologous region (lateral recess nuclei) in  
813 adult cichlids and bluegills (Demski, 1973; Demski and Knigge, 1971) can elicit feeding  
814 behavior, which is consistent with our hypothesis. Interestingly, while stimulating some of these  
815 regions induced food intake, other induced behaviors, such as the “snapping of gravel”, were  
816 reminiscent of food search or procurement. In mammals, electrical or optogenetic stimulation of  
817 LH neurons triggers voracious eating, again consistent with our findings that the LH is highly  
818 activated during the voracious eating phase in hungry fish (DELGADO and ANAND, 1953). In  
819 particular, GABAergic neurons that do not co-express MCH or Orexin have been shown to be  
820 responsive to food cues and are sufficient to stimulate food intake in mammals (Jennings et al.,  
821 2015). Whether these GABAergic and glutamatergic neurons of the zebrafish LH co-express  
822 other neuromodulators, as has been recently discovered in mammals (Mickelsen et al., 2019),  
823 remains to be explored. Overall, these data suggest that the zebrafish LH may similarly play an

824 important role in driving food intake during hunger, despite some differences in peptidergic  
825 expression from mammalian LH. Certainly, since cues such as water flow and optogenetic  
826 stimulation light are sufficient to modulate cH and/or LH neurons, these hypothalamic loci are  
827 likely also involved in other sensorimotor behaviors beyond appetite regulation.

828         In conclusion, we have shown here how anatomically segregated hypothalamic networks  
829 might interact to control energy homeostasis. We argue that the medial-lateral logic of  
830 hypothalamic function may be conserved even in non-mammalian vertebrates, though their  
831 activity patterns may possibly be more complex than originally believed. Our data suggests  
832 diverse roles of neuromodulators such as serotonin in regulating behavioral responses during  
833 hunger, which may complement mammalian observations. Finally, we propose that investigating  
834 large-scale network dynamics may reveal an additional layer of insights into the principles  
835 underlying homeostatic behavior, which might be overlooked when studies are restricted to the  
836 observation and perturbation of a small subpopulation.

### 837 838 **SUPPLEMENTARY FIGURE LEGENDS**

839  
840 **Supplementary Table 1:** Z-brain anatomical regions that are more activated in voraciously  
841 feeding (food-deprived + food) fish as compared to fed fish.

842  
843 **Supplementary Table 2:** Z-brain anatomical regions that are more activated in fed fish as  
844 compared to voraciously feeding (food-deprived + food) fish.

845  
846 **Video 1:** Z-stack (dorsal to ventral) of brain activity map shown in Figure 1b.

847  
848 **Video 2:** Video of larval zebrafish hunting artemia larvae. Prey-capture behavior, such as J-  
849 bends and pursuits, but no capture swims, were observed in response to artemia larvae.  
850 Recording rate: 30 fps. Playback rate: Real time.

### 851 852 **Supplementary File 1: Conceptual Circuit Model**

853 A comprehensive overview of our circuit model and current understanding, including a circuit  
854 diagram, detailed elaboration and testable predictions.

855  
856  
857  
858

859 **MATERIALS AND METHODS**

860

861 **Key Resource Table**

| Reagent type (species) or resource     | Designation                          | Source or reference              | Identifiers | Additional information                     |
|----------------------------------------|--------------------------------------|----------------------------------|-------------|--------------------------------------------|
| genetic reagent ( <i>danio rerio</i> ) | <i>Tg(pGal4FF:116A)</i>              | Characterized in this manuscript |             | Dr. Koichi Kawakami (NIG, Japan)           |
| genetic reagent ( <i>danio rerio</i> ) | <i>Tg(pGal4FF:76A)</i>               | PMID: 28425439                   |             | Dr. Koichi Kawakami (NIG, Japan)           |
| genetic reagent ( <i>danio rerio</i> ) | <i>Tg(y333:Gal4)</i>                 | PMID: 26635538                   |             | Dr. Harold Burgess (NIH)                   |
| genetic reagent ( <i>danio rerio</i> ) | <i>Tg(HuC:GCaMP6s)</i>               | PMID: 28892088                   |             | Dr. Florian Engert (Harvard)               |
| genetic reagent ( <i>danio rerio</i> ) | <i>Tg(UAS:GCaMP6s)</i>               | PMID: 28425439                   |             | Dr. Koichi Kawakami (NIG, Japan)           |
| genetic reagent ( <i>danio rerio</i> ) | <i>Tg(UAS:GCaMPHS)</i>               | PMID: 22046464                   |             | Dr. Koichi Kawakami (NIG, Japan)           |
| genetic reagent ( <i>danio rerio</i> ) | <i>Tg(UAS:ReaChR-RFP)</i>            | Characterized in this manuscript |             | Dr. Misha Ahrens (Janelia Research Campus) |
| genetic reagent ( <i>danio rerio</i> ) | <i>Tg(UAS-E1b:NTR-mCherry)</i>       | PMID: 17335798                   |             | Available from ZIRC                        |
| genetic reagent ( <i>danio rerio</i> ) | <i>Tg(Vglut2a:dsRed)</i>             | PMID: 19369545                   |             |                                            |
| genetic reagent ( <i>danio rerio</i> ) | <i>Tg(Gad1b:loxP-dsRed-loxP-GFP)</i> | PMID: 23946442                   |             |                                            |
| genetic reagent ( <i>danio rerio</i> ) | <i>Tg(Gad1b:GFP)</i>                 | PMID: 23946442                   |             |                                            |
| genetic reagent ( <i>danio rerio</i> ) | <i>Tg(TH2:GCamP5)</i>                | PMID: 26774784                   |             | Dr. Adam Douglass (University of Utah)     |

|                                                 |                             |                          |                                  |                                                                   |
|-------------------------------------------------|-----------------------------|--------------------------|----------------------------------|-------------------------------------------------------------------|
| <b>genetic reagent<br/>(<i>danio rerio</i>)</b> | <i>Tg(ETvmat2:GFP)</i>      | PMID:18164283            |                                  |                                                                   |
| <b>genetic reagent<br/>(<i>danio rerio</i>)</b> | <i>Tg(HCRT:RFP)</i>         | PMID: 25725064           |                                  |                                                                   |
| <b>antibody</b>                                 | Rabbit monoclonal anti-pERK | Cell Signaling           | 4370<br>RRID:AB_2315112          | IHC (1:500)                                                       |
| <b>antibody</b>                                 | mouse monoclonal anti-ERK   | Cell Signaling           | 4696<br>RRID:AB_390780           | IHC (1:500)                                                       |
| <b>antibody</b>                                 | rabbit polyclonal anti-5-HT | Sigma-Aldrich            | S5545<br>RRID:AB_477522          | IHC (1:500)                                                       |
| <b>antibody</b>                                 | goat polyclonal anti-5-HT   | AbCam                    | ab66047<br>RRID:AB_1142794       | IHC (1:500), 2% BSA in PBS blocking solution)                     |
| <b>antibody</b>                                 | goat polyclonal anti-MSH    | EMD Millipore            | AB5087<br>RRID:AB_91683          | IHC (1:500), 2% BSA in PBS blocking solution)                     |
| <b>antibody</b>                                 | rabbit polyclonal anti-AGRP | Phoenix Pharmaceuticals  | H-003-53<br>RRID:AB_2313908      | IHC (1:500)                                                       |
| <b>antibody</b>                                 | rabbit polyclonal anti-MCH  | Phoenix Pharmaceuticals  | H-070-47<br>RRID:AB_1001363<br>2 | IHC (1:500)                                                       |
| <b>antibody</b>                                 | rabbit polyclonal anti-CART | Phoenix Pharmaceuticals  | 55-102<br>RRID:AB_2313614        | IHC (1:500)                                                       |
| <b>antibody</b>                                 | rabbit polyclonal anti-NPY  | Immunostar               | 22940<br>RRID:AB_2307354         | IHC (1:500)                                                       |
| <b>antibody</b>                                 | mouse monoclonal anti-TH    | Immunostar               | 22941<br>RRID:AB_1624244         | IHC (1:500)                                                       |
| <b>chemical compound, drug</b>                  | DiD' solid (lipid dye)      | Thermo Fisher Scientific | D-7757                           | Stock solution (10mg/ml), working solution (2.5mg/ml), in ethanol |

862

863 *Fish husbandry and transgenic lines*

864

865 Larvae and adults were raised in facility water and maintained on a 14:10 hr light:dark cycle at

866 28°C. All protocols and procedures involving zebrafish were approved by the Harvard  
867 University/Faculty of Arts & Sciences Standing Committee on the Use of Animals in Research  
868 and Teaching (IACUC). WIK wildtype larvae and *mit1fa*<sup>-/-</sup> (*nacre*) larvae in the AB background,  
869 raised at a density of ~40 fish per 10 cm petri dish, were used for behavioral and MAP-  
870 mapping experiments.

871  
872 Transgenic lines *Tg(UAS-E1b:NTR-mCherry)* (Davison et al., 2007) (referred to as UAS:nfsb-  
873 mCherry), *Tg(UAS:GCaMPHS)* and *Tg(UAS:GCaMP6s)* (Muto and Kawakami, 2011; Muto et al.,  
874 2017), *Tg(HuC:GCaMP6s)* (Kim et al., 2017), *Tg(Vglut2a:dsRed)* (Miyasaka et al., 2009),  
875 *Tg(Gad1b:loxP-dsRed-loxP-GFP)* and *Tg(Gad1b:GFP)* (Satou et al., 2013), *Tg(TH2:GCamp5)*  
876 (McPherson et al., 2016), *Tg(ETvmat2:GFP)* (referred to as VMAT:GFP) (Wen et al., 2008),  
877 *Tg(HCRT:RFP)* (Liu et al., 2015) have all been previously described and characterized.  
878 *Tg(pGal4FF:116A)* (referred to as 116A:Gal4) was isolated from a gene trap screen by the  
879 Kawakami group (Kawakami et al., 2010); *Tg(pGal4FF:76A)* was recently published by the  
880 same group (Muto et al., 2017). *Tg(y333:Gal4)* from a different enhancer trap screen was used  
881 to drive expression in the cH in cases where 116A:Gal4-driven expression was sparse  
882 (Marquart et al., 2015). *Tg(UAS:ReaChR-RFP)* was generated by Chao-Tsung Yang (Ahrens  
883 lab, Janelia Research Campus) using Tol2 transgenesis. The same optogenetic channel was  
884 previously validated in zebrafish in Dunn et al., 2016.

885

#### 886 MAP-mapping of appetite regions

887

888 More details on the MAP-mapping procedure can be found in Randlett et al (2015). 5-6 dpf,  
889 *mit1fa*<sup>-/-</sup> (*nacre*) larvae in the AB background larvae were fed an excess of paramecia once  
890 daily. On the day of the experiment (at 7dpf), the larvae were distributed randomly into two  
891 treatment groups: 1) FOOD-DEPRIVED, where larvae were transferred into a clean petri dish of  
892 facility water, taking care to rinse out all remaining paramecia or 2) FED, where after washing  
893 and transferring they were fed again with an excess of paramecia. After two hours, larvae in  
894 both groups were fed with paramecia. After 15 minutes, larvae were quickly funneled through a  
895 fine-mesh sieve, and the sieve was then immediately dropped into ice-cold 4%  
896 paraformaldehyde (PFA) in PBS (PH 7.2-7.4). Fish were then immunostained with procedures  
897 as reported below (see Immunostaining methods). The rabbit anti-pERK antibody (Cell  
898 Signaling, #4370) and mouse anti-ERK (p44/42 MAPK (Erk1/2) (L34F12) (Cell Signaling,  
899 #4696) were used at a 1:500 dilution. Secondary antibodies conjugated with alexa-fluorophores  
900 (Life Technologies) were diluted 1:500. For imaging, fish were mounted dorsal-up in 2% (w/v)  
901 low melting agarose in PBS (Invitrogen) and imaged at ~0.8/0.8/2 µm voxel size (x/y/z) using an  
902 upright confocal microscope (Olympus FV1000), using a 20x 1.0NA water dipping objective. All  
903 fish to be analyzed in a MAP-Mapping experiment were mounted together on a single imaging  
904 dish, and imaged in a single run, alternating between treatment groups.

905

#### 906 Whole-mount Immunostaining

907

908 24 hours after fixation (4% paraformaldehyde (PFA) in PBS), fish were washed in PBS + 0.25%  
909 Triton (PBT), incubated in 150mM Tris-HCl at pH 9 for 15 min at 70°C (antigen retrieval),

910 washed in PBT, permeabilized in 0.05% Trypsin-EDTA for 45 min on ice, washed in PBT,  
911 blocked in blocking solution (10% Goat Serum, 0.3% Triton in BSS or 2% BSA in PBS, 0.3%  
912 Triton) for at least an hour and then incubated in primary and secondary antibodies for up to 3  
913 days at 4°C diluted in blocking solution. In-between primary and secondary antibodies, fish were  
914 washed in PBT and blocked for an hour. If necessary, pigmented embryos were bleached for 5  
915 min after fixation with a 5%KOH/3%H<sub>2</sub>O<sub>2</sub> solution.

916  
917 The protocol was similar for dissected brains, except that the brains were dissected in PBS after  
918 24 hours of fixation, and the Tris-HCL antigen retrieval/permeabilization step in Trypsin-EDTA  
919 was omitted. Dissected brains were mounted ventral up on slides in 70% glycerol prior to  
920 imaging. Confocal images of dissected brains were obtained using either a Zeiss LSM 700 or  
921 Olympus FV1000.

#### 922 923 Quantification of 5-HT overlap with transgenic lines

924  
925 The same individual manually quantified overlap of all transgenic lines with whole-mount or  
926 dissected 5-HT staining, to maintain standardization.

#### 927 928 Quantification of food intake

929  
930 Paramecia cultures (~1-2 500 ml bottles) were harvested, spun down gently (<3000 rpm) and  
931 concentrated, and subsequently incubated with lipid dye (DiD' solid, D-7757, Thermo Fisher  
932 Scientific, dissolved in ethanol) for > 2 hrs (5 µl of 2.5mg/ml working solution per 1 ml of  
933 concentrated paramecia) on a rotator with mild agitation. They were then spun down gently  
934 (<3000 rpm), rinsed and reconstituted in deionized water. An equal amount (100µl, ~500  
935 paramecia) was pipetted into each 10 cm dish of larvae. This method was adapted from  
936 Shimada et al., 2012. After the experiment, larvae were fixed and mounted on their sides on  
937 glass slides or placed in wells of a 96 well plate. They were then imaged using the AxioZoom  
938 V16 (Zeiss) and analyzed using custom Fiji software (Schindelin et al., 2012). In cases where  
939 identity of larvae needed to be maintained, for example, to correlate food intake with brain  
940 activity, larvae were imaged and subsequently stained individually in 96 well plates. This led to  
941 more variable staining which precludes analysis of mean fluorescence.

942  
943 Larvae were always distributed randomly into experimental groups.

#### 944 945 Quantification of LH and cH activity in dissected brains

946  
947 Brains within each dataset were usually registered onto a selected reference image from the  
948 same dataset using the same CMTK registration software used in MAP-mapping. Further  
949 analysis was then performed using custom Fiji and MATLAB software.

950  
951 For quantification of cH, mLH and pERK fluorescence intensity, ROIs were manually defined  
952 using the reference image, and pERK intensity was quantified over all registered images and  
953 averaged across the entire lobe (multiple z-planes) as well as across both lobes. Analysis of cH



954 pERK fluorescence was restricted to the most ventral planes, as more dorsal cH neurons show  
955 weaker correlation with feeding states (as seen in Figure 2 – Figure Supplement 4).

956  
957 For quantification of mLH and ILH active cell count, automated analysis of cell count was again  
958 performed using custom Fiji software, namely: 1) Image processing to reduce background and  
959 enhance contrast 2) Adaptive thresholding to isolate strongly-stained cells 3) Applying the  
960 “Analyze Particles” function to quantify the number of cells within each manually-defined ROI.

961  
962 Aggregation and visualization of results was performed using custom MATLAB software.

963  
964 Note that, in experiments in which the data was collected without the tERK channel (e.g. from  
965 Figure 2), thus prohibiting image registration, ROIs were drawn manually over each region  
966 across all z-planes and averaged to obtain mean fluorescence values.

967 For Figure 2 - Figure Supplement 1, where individual fish were stained, all measurements,  
968 including cell count, were made manually. In addition, background fluorescence was measured  
969 for each sample and subtracted from measured values.

970  
971 Calcium imaging

972  
973 For confocal calcium imaging of the cH and LH simultaneously in the presence of food,  
974 *Tg(76A:Gal4;116A:Gal4; UAS:GCaMP6s)* triple transgenic fish were embedded in 1.8%  
975 agarose, with their eyes/nostrils were released. GCaMP activity from a single z-plane (where  
976 the cH and LH neurons could be seen) was imaged using a confocal microscope (Olympus  
977 FV1000) at 1 fps. After a 5 min habituation period and a 10 min baseline period, a dense drop of  
978 paramecia was pipetted into the dish. Due to paramecia phototaxis, most of the paramecia  
979 moved into close vicinity of the fish’s head under the laser, allowing for strong visual/olfactory  
980 exposure to paramecia. After image registration (TurboReg Fiji Plugin, Thevenaz et al., 1998),  
981 and downsampling (Fiji/MATLAB), manually-segmented ROIs were selected and total  
982 fluorescence within the ROI was calculated. Cross-correlation and other analyses were  
983 performed using custom MATLAB software.

984  
985 For confocal calcium imaging of the caudal hypothalamus (Figure 2- Figure Supplement 3), 4 to  
986 6 food-deprived (2-6 hrs) or fed larvae expressing *Tg(116A:Gal4; UAS:GCaMP6s)*, were  
987 embedded in 1.5% agarose on a large petri dish, and a z-stack covering the entire caudal  
988 hypothalamus imaged using multi-area time lapse imaging every 5 minutes for 2 hrs. Maximum  
989 projection images from the timelapse series were aligned to the first image of the series and  
990 total fluorescence of both caudal hypothalamic nuclei was subsequently measured using  
991 manually-drawn ROIs in ImageJ, to obtain the average calcium activity for each fish at each  
992 time point.

993  
994 For 2P imaging of the cH and LH simultaneously in the absence of food (Figure 2 - Figure  
995 Supplement 4-5), *Tg(76A:Gal4;116A:Gal4; UAS:GCaMP6s)* triple transgenic fish were  
996 embedded in 1.8% agarose. GCaMP activity from either multiple slices (3 z-planes spanning a  
997 ~20  $\mu$ m volume of the intermediate hypothalamus using an electrically-tunable liquid lens

998 (Edmund Optics, 83-922), 237 ms per z-plane) or a single z-plane where the cH and LH  
999 neurons (1.5 fps) could be seen was imaged using custom 2P microscopes. After image  
1000 registration and downsampling to cell-sized voxels (Fiji/MATLAB), manually segmented ROIs  
1001 were selected and total fluorescence within the ROI was calculated. Clustering, spike detection  
1002 and other analyses were again performed using custom MATLAB software.

1003

#### 1004 Optogenetic stimulation and simultaneous calcium imaging

1005

1006 Optogenetic stimulation and calcium imaging was performed on a confocal microscope (Zeiss  
1007 LSM 880) using a 633 nm laser for ReaChR activation, and a 488 nm laser for calcium imaging.  
1008 *Tg(y333:Gal4;UASReaChR-RFP; HuCGCaMP6s)* triple-transgenic fish were used to record LH  
1009 activity after ReaChR activation. As *Tg(HuC:GCaMP6)* does not label the cH, in some cases we  
1010 used fish that also had *Tg(UAS:GCaMP6s)* co-expressed in cH, allowing for monitoring of cH  
1011 activity directly.

1012

1013 The ReaChR activation spectrum is wide and 488 nm laser power at sufficiently high intensities  
1014 is sufficient to activate ReaChR. Since *Tg(y333:Gal4;UASGCaMP6s)* is expressed strongly in  
1015 the cH, weak 488 nm laser power can be used to monitor cH activity after ReaChR activation of  
1016 cH. On the other hand, *Tg(HuC:GCaMP6s)* expression in the LH is considerably weaker than  
1017 *Tg(UAS:GCaMP6s)* expression driven by *Tg(y333:Gal4)*, and recording LH activity requires high  
1018 laser power. Thus, during LH recording trials, we could not simultaneously image the cH.

1019

1020 Fed fish were embedded in 1.8%-2% agarose, with tails, mouth and eyes freed, 15-20 minutes  
1021 before imaging in the absence of food. For baseline recording, spontaneous activities in cH or  
1022 LH were recorded. ReachR activation was then induced in one side of cH periodically for 10-15  
1023 s, and ensuing activity in one or both sides of LH or cH was recorded continuously during  
1024 intervals (of 120-180s) between stimuli.

1025

#### 1026 Nitroreductase-mediated ablations

1027

1028 Larvae expressing *Tg(116A:Gal4;UAS:nfsb-mCherry)*, or their non-transgenic siblings were  
1029 incubated in 2.5mM Metronidazole (Sigma-Aldrich, M3761) from 4-6 dpf/5-7 dpf. MTZ was  
1030 subsequently washed out, and food intake was measured at 7 or 8 dpf. For these experiments,  
1031 the MTZ-treated siblings were used as the control group. Each control or ablated group was  
1032 food-deprived or fed for 2 hrs, and labeled food was added to quantify food intake. In the case  
1033 of fed fish, unlabeled food was very gently washed out 15 mins before the experiment and the  
1034 food-deprived fish were also agitated slightly to simulate a short washout.

1035

#### 1036 Optogenetic stimulation with behavior

1037

1038 Optogenetic stimulation was done by placing a square LED panel (630 nm, 0.12mW/mm<sup>2</sup> driven  
1039 at full current, Soda Vision, Singapore) directly on top of petri dishes containing ReaChR  
1040 positive or negative fish, for 10 minutes continuously before or during feeding. We had  
1041 attempted other methods of stimulating the fish (e.g. pulsed LED stimulation) but found that it

1042 was disruptive to behavior.

1043

1044 Artemia Hunting Video

1045

1046 7 dpf larval fish were food-deprived for 2 hours, acclimatized in 24 well plates for 30 minutes,  
1047 and then fed either an excess of hatched artemia or paramecia. Raw videos of hunting behavior  
1048 were then recorded for 10 min at 30 fps using a high-resolution monochrome camera (Basler  
1049 acA4924) and custom Python-based acquisition software.

1050

1051 High-resolution behavioral tracking

1052

1053 We developed a system (Johnson et al., 2019) in which a high-speed infrared camera moves on  
1054 motorized rails to automatically track a zebrafish larvae in a large pool (300 x 300 x 4mm). A  
1055 single fish is recruited to the arena center with motion cues delivered from a projector to initiate  
1056 each trial. Paramecia are dispersed throughout the middle of the pool For analysis 60 Hz image  
1057 frames are centered and aligned. In every frame, the tail was skeletonized and the gaze angle  
1058 of each eye is calculated. The eyes can each move from around zero degrees (parallel to body-  
1059 axis) to 40 degrees (converged for hunting). Each bout was then represented as a point in 220-  
1060 dimensional posture space by accumulating 22 posture measurements (20 tail tangent angles to  
1061 encode tail shape, and 2 eye gaze angles) across 10 image frames (~167 ms) from the  
1062 beginning of each bout. All bouts were then mapped to a 2-D space with t-distributed stochastic  
1063 neighbor embedding (t-SNE), Four major hunting bout types can be identified from this  
1064 embedding. Hunts begin with the “j-turn”, and fish follow and advance toward prey objects with  
1065 “pursuit” bouts. Hunts end with an “abort” or a “strike”. When the fish is not actively involved in  
1066 a hunt, it explores the arena with “exploratory” bouts. Fractions of hunting bouts were then  
1067 compared between fed and food-deprived fish in 3-minute time bins over 45 min.

1068

1069 Statistics

1070

1071 All error bars show mean  $\pm$  SEM over fish. Significance was reported as follows: \* $p < 0.05$ .  
1072 Significance was determined using the non-parametric Wilcoxon Sign Rank test for paired data  
1073 and the Wilcoxon rank Sum test for independent samples. One-tail tests were performed in  
1074 cases where there was a prior prediction regarding the direction of change. A one-or two-way  
1075 ANOVA (Tukey-Kramer correction, MATLAB statistical toolbox) was used in cases where  
1076 multiple comparisons were involved.

1077

1078 **ACKNOWLEDGEMENTS**

1079

1080 We thank Harold Burgess kindly provided us with the y333:Gal4 transgenic line. We further  
1081 thank Thomas Panier who assisted Robert Johnson in construction of the rig used for high  
1082 resolution behavioral imaging. Support from Steve Turney and the CBS imaging facility, and the  
1083 Harvard Center for Biological Imaging were essential for the successful completion of many  
1084 experiments. Finally, we would like to thank Jessica Miller, Steve Zimmerman, Karen Hurley  
1085 and Brittany Hughes at Harvard for providing invaluable fish care.

1086 **COMPETING INTERESTS**

1087 The authors declare no competing interests.

1088

1089

1090 **REFERENCES**

1091

1092 Ahima, R.S., and Antwi, D.A. (2008). Brain regulation of appetite and satiety. *Endocrinol. Metab. Clin. North Am.* 37, 811–823.

1094 Ammar, A.A., Södersten, P., and Johnson, A.E. (2001). Locus coeruleus noradrenergic lesions attenuate intraoral intake. *Neuroreport* 12, 3095–3099.

1096 ANAND, B.K., and BROBECK, J.R. (1951). Hypothalamic control of food intake in rats and cats. *Yale J. Biol. Med.* 24, 123–140.

1098 Berthoud, H.-R. (2002). Multiple neural systems controlling food intake and body weight.

1099 *Neurosci. Biobehav. Rev.* 26, 393–428.

1100 Betley, J.N., Xu, S., Cao, Z.F.H., Gong, R., Magnus, C.J., Yu, Y., and Sternson, S.M. (2015).

1101 Neurons for hunger and thirst transmit a negative-valence teaching signal. *Nature* 521, 180–185.

1103 Bianco, I.H., and Engert, F. (2015). Visuomotor Transformations Underlying Hunting Behavior in Zebrafish. *Curr. Biol.* 25, 831–846.

1105 Bianco, I.H., Kampff, A.R., and Engert, F. (2011). Prey capture behavior evoked by simple visual stimuli in larval zebrafish. *Front. Syst. Neurosci.* 5, 101.

1107 BROBECK, J.R., LARSSON, S., and REYES, E. (1956). A study of the electrical activity of the hypothalamic feeding mechanism. *J. Physiol.* 132, 358–364.

1109 Chen, Y., Lin, Y.-C., Kuo, T.-W., and Knight, Z.A. (2015). Sensory Detection of Food Rapidly Modulates Arcuate Feeding Circuits. *Cell* 160, 829–841.

1111 Davison, J.M., Akitake, C.M., Goll, M.G., Rhee, J.M., Gosse, N., Baier, H., Halpern, M.E., Leach, S.D., and Parsons, M.J. (2007). Transactivation from Gal4-VP16 transgenic insertions for tissue-specific cell labeling and ablation in zebrafish. *Dev. Biol.* 304, 811–824.

1114 DELGADO, J.M.R., and ANAND, B.K. (1953). Increase of food intake induced by electrical stimulation of the lateral hypothalamus. *Am. J. Physiol.* 172, 162–168.

1116 Demski, L.S. (1973). Feeding and aggressive behavior evoked by hypothalamic stimulation in a cichlid fish. *Comp. Biochem. Physiol. Part A Physiol.* 44, 685–692.

1118 Demski, L.S., and Knigge, K.M. (1971). The telencephalon and hypothalamus of the bluegill (*Lepomis macrochirus*): evoked feeding, aggressive and reproductive behavior with representative frontal sections. *J. Comp. Neurol.* 143, 1–16.

1121 Dietrich, M.O., Zimmer, M.R., Bober, J., and Horvath, T.L. (2015). Hypothalamic *Agrp* neurons drive stereotypic behaviors beyond feeding. *Cell* 160, 1222–1232.

1123 Dockray, G.J. (2009). The versatility of the vagus. *Physiol. Behav.* 97, 531–536.

1124 Dunn, T.W., Mu, Y., Narayan, S., Randlett, O., Naumann, E.A., Yang, C.-T., Schier, A.F.,

1125 Freeman, J., Engert, F., and Ahrens, M.B. (2016). Brain-wide mapping of neural activity controlling zebrafish exploratory locomotion. *Elife* 5.

1127 Elipot, Y., Hinaux, H., Callebert, J., and Rétaux, S. (2013). Evolutionary shift from fighting to foraging in blind cavefish through changes in the serotonin network. *Curr. Biol.* 23, 1–10.

1129 Filosa, A., Barker, A.J., Dal Maschio, M., and Baier, H. (2016). Feeding State Modulates Behavioral Choice and Processing of Prey Stimuli in the Zebrafish Tectum. *Neuron* 90, 596–608.

1132 Gaspar, P., and Lillesaar, C. (2012). Probing the diversity of serotonin neurons. *Philos. Trans. R. Soc. Lond. B. Biol. Sci.* 367, 2382–2394.

1134 Hoebel, B.G. (1965). Hypothalamic Lesions by Electrocauterization: Disinhibition of Feeding and Self-Stimulation. *Science* 149, 452–453.

1135

- 1136 Jennings, J.H., Ung, R.L., Resendez, S.L., Stamatakis, A.M., Taylor, J.G., Huang, J., Veleta, K.,  
1137 Kantak, P.A., Aita, M., Shilling-Scriver, K., et al. (2015). Visualizing Hypothalamic Network  
1138 Dynamics for Appetitive and Consummatory Behaviors. *Cell* *160*, 516–527.
- 1139 Johnson, R.E., Linderman, S., Panier, T., Wee, C.L., Song, E., Herrera, K.J., Miller, A., and  
1140 Engert, F. (2019). Probabilistic Models of Larval Zebrafish Behavior: Structure on Many Scales.  
1141 bioRxiv 672246.
- 1142 Jordi, J., Guggiana-Nilo, D., Soucy, E., Song, E.Y., Wee, C.L., and Engert, F. (2015). A high-  
1143 throughput assay for quantifying appetite and digestive dynamics. *Am. J. Physiol. Regul. Integr.*  
1144 *Comp. Physiol.* *ajpregu.00225.2015*.
- 1145 Jordi, J., Guggiana-Nilo, D., Bolton, A.D., Prabha, S., Ballotti, K., Herrera, K., Rennekamp, A.J.,  
1146 Peterson, R.T., Lutz, T.A., and Engert, F. (2018). High-throughput screening for selective  
1147 appetite modulators: A multibehavioral and translational drug discovery strategy. *Sci. Adv.* *4*,  
1148 eaav1966.
- 1149 Kantak, K.M., Wayner, M.J., and Stein, J.M. (1978). Effects of various periods of food  
1150 deprivation on serotonin turnover in the lateral hypothalamus. *Pharmacol. Biochem. Behav.* *9*,  
1151 529–534.
- 1152 Kaslin, J., and Panula, P. (2001). Comparative anatomy of the histaminergic and other  
1153 aminergic systems in zebrafish (*Danio rerio*). *J. Comp. Neurol.* *440*, 342–377.
- 1154 Kawakami, K., Abe, G., Asada, T., Asakawa, K., Fukuda, R., Ito, A., Lal, P., Mouri, N., Muto, A.,  
1155 Suster, M.L., et al. (2010). zTrap: zebrafish gene trap and enhancer trap database. *BMC Dev.*  
1156 *Biol.* *10*, 105.
- 1157 Kim, D.H., Kim, J., Marques, J.C., Grama, A., Hildebrand, D.G.C., Gu, W., Li, J.M., and Robson,  
1158 D.N. (2017). Pan-neuronal calcium imaging with cellular resolution in freely swimming zebrafish.  
1159 *Nat. Methods*.
- 1160 Krasne, F.B. (1962). General Disruption Resulting from Electrical Stimulus of Ventromedial  
1161 Hypothalamus. *Science* *138*, 822–823.
- 1162 Lillesaar, C. (2011). The serotonergic system in fish. *J. Chem. Neuroanat.* *41*, 294–308.
- 1163 Lin, J.Y., Knutsen, P.M., Muller, A., Kleinfeld, D., and Tsien, R.Y. (2013). ReaChR: a red-shifted  
1164 variant of channelrhodopsin enables deep transcranial optogenetic excitation. *Nat. Neurosci.* *16*,  
1165 1499–1508.
- 1166 Liu, J., Merkle, F.T., Gandhi, A. V, Gagnon, J.A., Woods, I.G., Chiu, C.N., Shimogori, T., Schier,  
1167 A.F., and Prober, D.A. (2015). Evolutionarily conserved regulation of hypocretin neuron  
1168 specification by *Lhx9*. *Development* *142*, 1113–1124.
- 1169 Mandelblat-Cerf, Y., Ramesh, R.N., Burgess, C.R., Patella, P., Yang, Z., Lowell, B.B., and  
1170 Andermann, M.L. (2015). Arcuate hypothalamic AgRP and putative POMC neurons show  
1171 opposite changes in spiking across multiple timescales. *Elife* *4*, e07122.
- 1172 Marquart, G.D., Tabor, K.M., Brown, M., Strykowski, J.L., Varshney, G.K., LaFave, M.C.,  
1173 Mueller, T., Burgess, S.M., Higashijima, S., and Burgess, H.A. (2015). A 3D Searchable  
1174 Database of Transgenic Zebrafish Gal4 and Cre Lines for Functional Neuroanatomy Studies.  
1175 *Front. Neural Circuits* *9*, 78.
- 1176 McPherson, A.D., Barrios, J.P., Luks-Morgan, S.J., Manfredi, J.P., Bonkowsky, J.L., Douglass,  
1177 A.D., and Dorsky, R.I. (2016). Motor Behavior Mediated by Continuously Generated  
1178 Dopaminergic Neurons in the Zebrafish Hypothalamus Recovers after Cell Ablation. *Curr. Biol.*  
1179 *26*, 263–269.
- 1180 Mickelsen, L.E., Bolisetty, M., Chimileski, B.R., Fujita, A., Beltrami, E.J., Costanzo, J.T.,  
1181 Naparstek, J.R., Robson, P., and Jackson, A.C. (2019). Single-cell transcriptomic analysis of  
1182 the lateral hypothalamic area reveals molecularly distinct populations of inhibitory and excitatory  
1183 neurons. *Nat. Neurosci.* *22*, 642–656.
- 1184 Miyasaka, N., Morimoto, K., Tsubokawa, T., Higashijima, S., Okamoto, H., and Yoshihara, Y.  
1185 (2009). From the olfactory bulb to higher brain centers: genetic visualization of secondary  
1186 olfactory pathways in zebrafish. *J. Neurosci.* *29*, 4756–4767.

1187 Muto, A., and Kawakami, K. (2011). Imaging functional neural circuits in zebrafish with a new  
1188 GCaMP and the Gal4FF-UAS system. *Commun. Integr. Biol.* *4*, 566–568.  
1189 Muto, A., Lal, P., Ailani, D., Abe, G., Itoh, M., and Kawakami, K. (2017). Activation of the  
1190 hypothalamic feeding centre upon visual prey detection. *Nat. Commun.* *8*, 15029.  
1191 Pérez, M.R., Pellegrini, E., Cano-Nicolau, J., Gueguen, M.-M., Menouer-Le Guillou, D., Merot,  
1192 Y., Vaillant, C., Somoza, G.M., and Kah, O. (2013). Relationships between radial glial  
1193 progenitors and 5-HT neurons in the paraventricular organ of adult zebrafish - potential effects  
1194 of serotonin on adult neurogenesis. *Eur. J. Neurosci.* *38*, 3292–3301.  
1195 Pollock, J.D., and Rowland, N. (1981). Peripherally administered serotonin decreases food  
1196 intake in rats. *Pharmacol. Biochem. Behav.* *15*, 179–183.  
1197 Randlett, O., Wee, C.L., Naumann, E.A., Nnaemeka, O., Schoppik, D., Fitzgerald, J.E.,  
1198 Portugues, R., Lacoste, A.M.B., Riegler, C., Engert, F., et al. (2015). Whole-brain activity  
1199 mapping onto a zebrafish brain atlas. *Nat. Methods* *12*, 1039–1046.  
1200 Satou, C., Kimura, Y., Hirata, H., Suster, M.L., Kawakami, K., and Higashijima, S. (2013).  
1201 Transgenic tools to characterize neuronal properties of discrete populations of zebrafish  
1202 neurons. *Development* *140*, 3927–3931.  
1203 Schindelin, J., Arganda-Carreras, I., Frise, E., Kaynig, V., Longair, M., Pietzsch, T., Preibisch,  
1204 S., Rueden, C., Saalfeld, S., Schmid, B., et al. (2012). Fiji: an open-source platform for  
1205 biological-image analysis. *Nat. Methods* *9*, 676–682.  
1206 Semmelhack, J.L., Donovan, J.C., Thiele, T.R., Kuehn, E., Laurell, E., and Baier, H. (2015). A  
1207 dedicated visual pathway for prey detection in larval zebrafish. *Elife* *4*.  
1208 Shimada, Y., Hirano, M., Nishimura, Y., and Tanaka, T. (2012). A high-throughput fluorescence-  
1209 based assay system for appetite-regulating gene and drug screening. *PLoS One* *7*, e52549.  
1210 Sternson, S.M., and Eiselt, A.-K. (2017). Three Pillars for the Neural Control of Appetite. *Annu.*  
1211 *Rev. Physiol.* *79*, 401–423.  
1212 Stuber, G.D., and Wise, R.A. (2016). Lateral hypothalamic circuits for feeding and reward. *Nat.*  
1213 *Neurosci.* *19*, 198–205.  
1214 TEITELBAUM, P., and EPSTEIN, A.N. (1962). The lateral hypothalamic syndrome: recovery of  
1215 feeding and drinking after lateral hypothalamic lesions. *Psychol. Rev.* *69*, 74–90.  
1216 Thevenaz, P., Ruttimann, U.E., and Unser, M. (1998). A pyramid approach to subpixel  
1217 registration based on intensity. *IEEE Trans. Image Process.* *7*, 27–41.  
1218 Trivedi, C.A., and Bollmann, J.H. (2013). Visually driven chaining of elementary swim patterns  
1219 into a goal-directed motor sequence: a virtual reality study of zebrafish prey capture. *Front.*  
1220 *Neural Circuits* *7*, 86.  
1221 Voigt, J.-P., and Fink, H. (2015). Serotonin controlling feeding and satiety. *Behav. Brain Res.*  
1222 *277*, 14–31.  
1223 Watts, A.G. (2000). Understanding the neural control of ingestive behaviors: helping to separate  
1224 cause from effect with dehydration-associated anorexia. *Horm. Behav.* *37*, 261–283.  
1225 Wen, L., Wei, W., Gu, W., Huang, P., Ren, X., Zhang, Z., Zhu, Z., Lin, S., and Zhang, B. (2008).  
1226 Visualization of monoaminergic neurons and neurotoxicity of MPTP in live transgenic zebrafish.  
1227 *Dev. Biol.* *314*, 84–92.  
1228 Zhu, J.-N., and Wang, J.-J. (2008). The cerebellum in feeding control: possible function and  
1229 mechanism. *Cell. Mol. Neurobiol.* *28*, 469–478.  
1230  
1231  
1232
